# Supplementary material for: Remote Medical Scent Detection of Cancer and Infectious Diseases With Dogs and Rats: a Systematic Review
Source: Research Square preprint supplement (doi:10.21203/rs.3.rs-753298/v1), 2021-08-03
Supplement: Supplementary file 1 [file 6a5750bd376f5ba4af3eb31b.xlsx]

## Sheet: Table 1 - General
Table 1 - General description
Year	1st author	Title	Animal - class	Disease	Sample	Sensitivity	Specificity
2004	Willis	Olfactory detection of human bladder cancer by dogs: proof of principle study	Dog	Cancer - Bladder	Urine	0.41	UC
2004	Pickel	Evidence for canine olfactory detection of melanoma	Dog	Cancer - Melanoma	Tissue	1	1
					Human	0.8	UC
2006	McCulloch	Diagnostic Accuracy of Canine Scent Detection in Early- and Late-Stage Lung and Breast Cancers	Dog	Cancer - Breast	Breath	0.97	1
				Cancer - Lung	Breath	0.99	0.98
2008	Gordon	The Use of Canines in the Detection of Human Cancers	Dog	Cancer - Breast	Urine	0.22	FC
				Cancer - Prostate	Urine	0.18	FC
2008	Horvath	Human Ovarian Carcinomas Detected by Specific Odor	Dog	Cancer - Ovarian	Tissue	1	0.98
2009	Bart Jan Christiane Weetjens	African pouched rats for the detection of pulmonary tuberculosis in sputum samples	Rat	Tuberculosis	Sputum	0.73	0.93
2010	Horvath	Characteristic odour in the blood reveals ovarian carcinoma	Dog	Cancer - Ovarian	Tissue	1	0.96
					Plasma	1	0.94
2010	Cornu	Olfactory Detection of Prostate Cancer by Dogs Sniffing Urine: A Step Forward in Early Diagnosis	Dog	Cancer - Prostate	Urine	0.91	0.91
2011	Willis	Volatile organic compounds as biomarkers of bladder cancer: Sensitivity and specificity using trained sniffer dogs	Dog	Cancer - Bladder	Urine	0.64	FC
2011	Sonoda	Colorectal cancer screening with odour material by canine scent detection	Dog	Cancer - Colorectal	Stool	0.97	0.99
					Breath	0.91	0.99
2012	Buszewski	Identification of volatile lung cancer markers by gas chromatography–mass spectrometry: comparison with discrimination by canines	Dog	Cancer - Lung	Breath	0.82	0.82
2012	Ehmann	Canine scent detection in the diagnosis of lung cancer: revisiting a puzzling phenomenon	Dog	Cancer - Lung	Breath	0.9	0.72
2012	Walczak	Impact of individual training parameters and manner of taking breath odor samples on the reliability of canines as cancer screeners	Dog	Cancer (several)	Breath	0.37	FC
2012	Bomers	Using a dog’s superior olfactory sensitivity to identify Clostridium difficile in stools and patients: proof of principle study	Dog	Clostridium difficile	Stool	1	1
					Patients	0.83	0.98
2012	Georgies F Mgode	Diagnosis of tuberculosis by trained African giant pouched rats and confounding impact of pathogens and microflora of the respiratory tract	Rat	Tuberculosis	Sputum	0.804	0.724
2012	Mahoney	Pouched Rats’ Detection ofTuberculosis inHuman Sputum: Comparison to Culturing and Polymerase Chain Reaction	Rat	Tuberculosis	Sputum	0.68	0.87
2013	Horvath	Cancer odor in the blood of ovarian cancer patients: a retrospective study of detection by dogs during treatment, 3 and 6 months afterward	Dog	Cancer - Ovarian	Plasma (serie 1)	0.97	0.99
					Plasma (serie 2)	0.7	0.95
2014	Amundsen	Can dogs smell lung cancer? First study using exhaled breath and urine screening in unselected patients with suspected lung cancer	Dog	Cancer - Lung	Breath	0.7	0.083
					Urine	0.657	0.25
2014	Rudnicka	Determination of volatile organic compounds as potential markers of lung cancer by gas chromatography–mass spectrometry versus trained dogs	Dog	Cancer - Lung	Breath	0.86	0.72
2014	Elliker	Key considerations for the experimental training and evaluation of cancer odour detection dogs: lessons learnt from a double-blind, controlled trial of prostate cancer detection	Dog	Cancer - Prostate	Urine	0.17	0.72
2014	Bomers	A detection dog to identify patients with Clostridium difficile infection during a hospital outbreak	Dog	Clostridium difficile	Patients	0.86	0.97
2015	Rudnicka	IS IT POSSIBLE TO DETECT LUNG CANCER BY TRAINED DOGS?	Dog	Cancer - Lung	Breath	0.8554	0.7184
2015	Taverna	Olfactory System of Highly Trained Dogs Detects Prostate Cancer in Urine Samples	Dog	Cancer - Prostate	Urine	0.986	0.964
2015	Taverna	Ability of dogs to detect prostate cancer before and after radical prostatectomy	Dog	Cancer - Prostate	Urine and serum	1 (pre operatively)	UC
2015	Urbanova	Intensive training technique utilizing the dog's olfactory abilities to diagnose prostate cancer in men	Dog	Cancer - Prostate	Urine	0.935	0.916
2015	Yoel	Canine Scent Detection of Volatile Elements, Characteristic of Malignant Cells, in Cell Cultures	Dog	Cancer (several)	Cell culture	1	1
2015	Reither	Evaluation of Giant African Pouched Rats for Detection of Pulmonary Tuberculosis in Patients from a High-Endemic Setting	Rat	Tuberculosis	Sputum	0.569	0.805
2016	Hackner	Canine scent detection for the diagnosis of lung cancer in a screening-like situation	Dog	Cancer - Lung	Breath	0.786	0.344
2016	Willis	Invasive melanoma in vivo can be distinguished from basal cell carcinoma, benign naevi and healthy skin by canine olfaction: a proof-of-principle study of differential volatile organic compound emission	Dog	Cancer - Melanoma	Skin	0.45	UC
2016	Maurer	Detection of Bacteriuria by Canine Olfaction	Dog	UTI	Urine	0.996	0.915
2017	Guerrero-Flores	A non-invasive tool for detecting cervical cancer odor by trained scent dogs	Dog	Cancer - Cervical	Tissue: biopsies Smear samples Surgical bandages	Scrapes: 92,78% Surgical bandages: 96.36	Scrapes: 99.1% Surgical bandages: 99.55%
2017	Kitiyakara	The detection of Hepatocellular carcinoma (HCC) from patients’ breath using canine scent detection: Proof of concept study	Dog	Cancer - Liver	Breath	0.78	UC
2017	Guirao-Montes	Lung cancer diagnosis by trained dogs	Dog	Cancer - Lung	Breath	0.95	0.98
2017	Bryce	Identifying environmental reservoirs of Clostridium difficile with a scent detection dog: preliminary evaluation	Dog	Clostridium difficile	Cultures & Faeces	1	0.97
					Cultures & Faeces	0.8	0.929
2017	Koivusalo	Canine scent detection as a tool to distinguish meticillin-resistant Staphylococcus aureus	Dog	Methicillin-resistant Staphylococcus aureus	Cultures	0,75 - 0,97	0,83 - 0,96
2018	In-Seok Seo	Cross detection for odor of metabolic waste between breast and colorectal cancer using canine olfaction	Dog	Cancer - Breast	Cell culture	0.944	0.986
				Cancer - Colorectal	Cell culture	0.926	0.981
2018	Fischer-Tenhagen	A Proof of concept: are Detection Dogs a Useful Tool to Verify Potential Biomarkers for lung cancer?	Dog	Cancer - Lung	Breath	0.944444	0.6
2018	Pacik	Identification of Sarcosine as a Target Molecule for the Canine Olfactory Detection of Prostate Carcinoma	Dog	Cancer - Prostate	Artificially created urine samples	0.7	0.85
2018	Thuleau	A New Transcutaneous Method for Breast Cancer Detection with Dogs	Dog	Cancer - Breast	Sweat	0.903	FC
2018	Maureen T. Taylor	Using Dog Scent Detection as a Point-of-Care Tool to Identify Toxigenic Clostridium difficile in Stool	Dog	Clostridium difficile	Stool	0.851	0.848
2018	Edwards	Tuberculosis detection by pouched rats: opportunities for reinforcement under low-prevalence conditions	Rat	Tuberculosis	Sputum	UC	UC
2019	Schoon	How dogs learn to detect colon cancer – optimizing the use of training aids	Dog	Cancer - Colorectal	Stool	0.795	UC
2019	Biehl	VOC pattern recognition of lung cancer: a comparative evaluation of different dog- and eNose-based strategies using different sampling materials	Dog	Cancer - Lung	Breath	0.556	0.829
2019	Feil	Diagnosis of lung cancer by canine olfactory detection in urine and breath samples.	Dog	Cancer - Lung	Urine	0.878	0.976
					Breath	0.78	0.956
2019	Guirao	Trained dogs can identify malignant solitary pulmonary nodules in exhaled gas	Dog	Cancer - Lung	Breath	0.97	0.99
2019	Junqueira	Accuracy of Canine Scent Detection of Non-Small Cell Lung Cancer in Blood Serum	Dog	Cancer - Lung	Blood Serum	0.97	0.98
2019	Murarka	Testing ovarian cancer cell lines to train dogs to detect ovarian cancer from blood plasma: A pilot study	Dog	Cancer - Ovarian	Cell lines	UC	UC
2019	Protoshhak	Prostate cancer and dogs sense of smell: opportunities of noninvasive diagnostics	Dog	Cancer - Prostate	Urine	0.9785	0.95
2019	Chen Li	Using scent detection dogs to identify environmental reservoirs of Clostridium difficile: Lessons from the field	Dog	Clostridium difficile	Free running	UC	UC
2019	Guest	Trained dogs identify people with malaria parasites by their odour	Dog	Malaria	Foot odor	0,769 - 0,903	~0,9
2020	Shoko Kure	Breast Cancer Detection from a Urine Sample by Dog Sniffing	Dog	Cancer - Breast	Urine	1	1
2020	Yamamoto	The Trained Sniffer Dog Could Accurately Detect the Urine Samples from the Patients with Cervical Cancer, and Even Cervical Intraepithelial Neoplasia Grade 3: A Pilot Study	Dog	Cancer - Cervical	Urine	1	1
2020	Mazzola	Two-step investigation of lung cancer detection by sniffer dogs	Dog	Cancer - Lung	Urine	0,45-0,73	0,89-0,91
2020	Grandjean	Can the detection dog alert on COVID-19 positive persons by sniffing axillary sweat samples? A proof-of-concept study	Dog	COVID-19	Sweat	0,76 - 1	UC
2020	Jendrny	Scent dog identification of samples from COVID-19 patients - a pilot study	Dog	COVID-19	Saliva or tracheobronchial secretions	0.8263	0.9635
2020	Vesga	Dog Savior: Immediate Scent-Detection of SARS-COV-2 by Trained Dogs	Dog	COVID-19	Respiratory secretions	0.955	0.99
2021	Guest	Feasibility of integrating canine olfaction with chemical and microbial profiling of urine to detect lethal prostate cancer	Dog	Cancer - Prostate	Urine	0.71	0,7 - 0,76
2021	Eskandary	Sniffer dogs as a screening/diagnostic tool for COVID-19: a proof of concept study	Dog	COVID-19	Throat and pharyngeal secretions	0.65	0.89
					Breath & sweat	0.86	0.929
2021	Essler	Discrimination of SARS-CoV-2 infected patient samples by detection dogs: A proof of concept study	Dog	COVID-19	Urine and saliva	0.18	0.41
2021	Grandjean	Use Of Canine Olfactory Detection For COVID-19 Testing Study On U.A.E. Trained Detection Dog Sensitivity	Dog	COVID-19	Sweat	0,71 - 1	UC
2021	Guest	Using trained dogs and organic semi-conducting sensors to identify asymptomatic and mild SARS-CoV-2 infections .	Dog	COVID-19	Breath & sweat	0,82 - 0,94	0,76 - 0,92
2021	Jendrny	Scent dog identification of SARS-CoV-2 infections, similar across different body fluids	Dogs	COVID-19	Saliva, sweat, urine	Saliva = 0,82 Sweat = 0;91 Urine = 0,95	Saliva = 0,96 Sweat = 0,94 Urine = 0,98

## Sheet: Table 2 - Patients & Sample NB
Table 2 - Patients & Number of inclusions
Year	1st author	Disease	Number of different hospitals for sample source	Several hospitals for sample source?	Positive samples type	Control types	Controls similar to positives ?	Number of samples for training - total	Number of positive samples for training	Number of controls for training	Number of samples for testing - total	Number of positive samples for testing	Number of controls for testing	Controls reused (for testing)	Gold standard / Reference test
2004	Willis	Cancer - Bladder	UC	Yes	new or recurrent transitional cell carcinoma, before surgical intervention	diseased and healthy controls, with recent cystoscopy to exclude visible bladder malignancy	Yes	81	27	54	63	9	54	No	Cytoscopy
2004	Pickel	Cancer - Melanoma	1	No	mixture ofbasal, squamous and melanoma tissues	various distractor stimuli (e.g., adhesive bandages, gauze, latex gloves, rolls of tape)	No	UC	UC	UC	UC	UC	UC	UC	UC
			1	No	Melanoma, directly on patient	Bandages, directly on patient	Yes	UC	UC	UC	UC	7	UC	No	UC
2006	McCulloch	Cancer - Breast	3	Yes	Biopsy-confirmed conventional diagnosis breast cancer	Volunteers with no prior cancer history	Yes	91	25	66	23	6	17	UC	Biopsy
		Cancer - Lung	3	Yes	Biopsy-confirmed conventional diagnosis lung cancer	Volunteers with no prior cancer history	Yes	93	27	66	45	28	17	UC	Biopsy
2008	Gordon	Cancer - Breast	3	Yes	Men and women at least 40 years of age with untreated, biopsy- proven, breast cancer	Age-matched controls, most with normal mammograms within 6 months	Yes	187	53	134	63	9	54	No	Biopsy
		Cancer - Prostate	3	Yes	Men and women at least 40 years of age with untreated, biopsy- proven, prostate cancer	Age-matched controls, most with normal PSA test within 6 months	Yes	166	46	120	77	11	66	No	Biopsy
2008	Horvath	Cancer - Ovarian	1	No	Ovarian carcinoma samples ||| Other gynecological tumor samples, such as cervical, vulvar, and endometrial carcinomas, were also taken from a tumor bank and treated identically to the ovarian carcinomas	Abdominal fat and muscle, and small bowel samples were used as controls	Yes	UC	UC	UC	100	20	80	No	Biopsy
2009	Bart Jan Christiane Weetjens	Tuberculosis	UC	Yes	TB positive	TB negative	Yes	UC	UC	UC	819	67	752	No	Culture
2010	Horvath	Cancer - Ovarian	1	No	Biopsy positive	Abdominal fat and myomas and healthy postmenopausal ovarium samples were used as controls. Controls were accepted only in the complete absence of malignant cells	Yes	UC	UC	UC	60	10	50	No	Biopsy
		Cancer - Ovarian	1	No	Blood samples were obtained before primary surgery from patients with ovarian carcinoma and from patients with cervical, vulvar, and endometrial carcinomas	Control blood (plasma) samples were collected from young, healthy female individuals. However, in some cases we also used blood samples from male individuals, including handlers.	Yes	UC	UC	UC	60	10	50	No	Biopsy
2010	Cornu	Cancer - Prostate	1	No	Biopsy positive	Patients referred to a urologist for elevated prostate-specific antigen or abnormal digital rectal examination, with negative biopsies	Yes	42	26	16	66	33	33	Yes	Biopsy
2011	Willis	Cancer - Bladder	1	No	New or recurrent transitional cell carcinoma (TCC) of the bladder	Healthy and not healthy, but no cancer	Yes	240	40	200	210	30	180	No	Biopsy
2011	Sonoda	Cancer - Colorectal	3	Yes	Colorectal cancer	Healthy volunteers, and patients with previous history of cancer	Yes	UC	UC	UC	185	37	148	No	Colonoscopy & Biopsy
		Cancer - Colorectal	3	Yes	Colorectal cancer	Healthy volunteers, and patients with previous history of cancer	Yes	UC	~100	~500	165	33	132	No	Colonoscopy & Biopsy
2012	Buszewski	Cancer - Lung	1	No	Small-cell lung carcinoma & Non Small-cell lung carcinoma	Healthy volunteers	Yes	UC	UC	UC	73	29	44	Yes (deduced from the numbers)	Biopsy
2012	Ehmann	Cancer - Lung	2	Yes	Lung cancer	COPD or healthy volunteers	Yes	95	35	60	125	25	100	No	Biopsy
2012	Walczak	Cancer (several)	3	Yes	Pattern samples collected from 57 patients with breast cancer, 45 with melanoma, and 118 with lung cancer confirmed histopathologically, the collection occurring before any chemotherapy treatment	Control samples collected from 305 healthy (self- declared) volunteers	Yes	UC	UC	UC	UC	UC	UC	UC	Biopsy
2012	Bomers	Clostridium difficile	1	No	Positive immunoassay & culture	Negative immunoassay & negative culture	Yes	UC	UC	UC	100	50	50	No	Immunoassay & culture
		Clostridium difficile	2	Yes	Positive immunoassay & culture	Negative immunoassay & negative culture	No	0	0	0	300	30	270	No	Immunoassay & culture
2012	Georgies F Mgode	Tuberculosis	6	Yes	Tuberculosis (by cell culture)	Healthy	Yes	UC	UC	UC	284	56	228	No	Culture
2012	Mahoney	Tuberculosis	8	Yes	Tuberculosis (by cell culture)	Healthy	Yes	UC	UC	UC	490	81	409	UC	Culture & PCR
2013	Horvath	Cancer - Ovarian	1	No	Ovarian cancer - blood samples were taken before the sixth course of chemotherapy	Female medical staff volunteers in Gothenburg. Inclusion criteria were that the patients felt healthy, were not pregnant and were free of gynecological disease. Control and test materials were not age-matched.	Not aged matched	UC	UC	UC	252	42	210	No	UC
		Cancer - Ovarian	1	No	Ovarian cancer - Samples were taken 3 and 6 months after the sixth, final chemotherapy course.	Female medical staff volunteers in Gothenburg. Inclusion criteria were that the patients felt healthy, were not pregnant and were free of gynecological disease. Control and test materials were not age-matched.	Not aged matched	UC	UC	UC	60	10	50	No	UC
2014	Amundsen	Cancer - Lung	1	No	Lung cancer	Exhaled breath and urine samples from 20 presumably healthy young persons were used as control test material for training the dogs	UC	UC	UC	UC	93	63	30	UC	Biopsy
		Cancer - Lung	1	No	Lung cancer	Exhaled breath and urine samples from 20 presumably healthy young persons were used as control test material for training the dogs	UC	UC	UC	UC	77	UC	UC	UC	Biopsy
2014	Rudnicka	Cancer - Lung	1	No	Lung cancer	Healthy volunteers and COPD	Yes	UC	UC	UC	253	108	145	UC	Biopsy
2014	Elliker	Cancer - Prostate	1	No	Donors with prostate cancer that had been previously confirmed by biopsy but remained untreated	Control samples were collected from men with Benign Prostatic Hyperplasia (BPH – a benign enlargement of the prostate), as well as 10 healthy men without clinical symptoms	Yes	117	50	67	60	15	45	No	Biopsy
2014	Bomers	Clostridium difficile	1	No	Diarrhoea plus positive stool culture with a toxigenic strain of C. difficil	Non positive	Yes	UC	UC	UC	371	14	357	No	Culture
2015	Rudnicka	Cancer - Lung	1	No	Lung cancer	Healthy volunteers and COPD	Yes	UC	UC	UC	253	108	145	UC	Biopsy
2015	Taverna	Cancer - Prostate	1	No	Prostate cancer	No cancer	Yes	430	200	230	902	362	540	No	Biopsy
2015	Taverna	Cancer - Prostate	1	No	Participants, with different grades and stages of prostate cancer, who underwent radical prostatectomy for Pca (samples collected before and several times after operation)	UC	UC	UC	UC	UC	UC	UC	UC	UC	Biopsy
2015	Urbanova	Cancer - Prostate	1	No	Patients with a histologically confirmed carcinoma of the prostate	Urine samples from urological patients with a negative histological report for the prostate	Yes	UC	UC	UC	70	45	25	Yes	Biopsy
2015	Yoel	Cancer (several)	1	No	Cell cultures of breast cancer MCF7 (ATCC, HEB-22) cells (target specimens)	Pseudo-normal keratinocyte cell line HaCaT (CLS-HaCaT- DKFZ), which does not have malignant potential in laboratory animals (control specimens)	Yes	UC	UC	UC	UC	20	UC	UC	Cell lines
2015	Reither	Tuberculosis	1	No	TB positive	Non TB positive	Yes	UC	UC	UC	469	109	360	No	Sputum smear microscopy and culture, including subsequent antigen or molecular confirmation of Mycobacterium tuberculosis, and by clinical data at enrolment and for at least 5-months of follow-up to determine the reference standard
2016	Hackner	Cancer - Lung	3	Yes	Lung cancer patients with a history of smoking	Smokers without clinical and radiological evidence of lung cancer	Yes	150	UC	UC	122	29	93	No	Biopsy
2016	Willis	Cancer - Melanoma	UC	Yes	Melanoma	No melanoma or history of melanoma <5 years, but basal cell carcinoma, benign naevi and healthy skin	Yes	UC	UC	UC	200	20	180	No	Biopsy
2016	Maurer	UTI	UC	UC	Cases were bacterial-culture positive (>100 000 colony-forming units [cfu]/mL)	Controls were bacterial-culture negative	UC	UC	UC	UC	UC	231	456	No	Culture
2017	Guerrero-Flores	Cancer - Cervical	1	No	Cervical cancer	Healthy cervical smears/surgical bandages samples	UC	Training on biopsy, smear and bandages	UC	UC	Scrapes: 873 Surgical bandages: 495	Scrapes: 97 Surgical bandages: 55	Scrapes: 776 Surgical bandages: 440	Yes	The gold standard was the biopsy (for cervical cancer sample) or cervical cytology (for healthy subjects).
2017	Kitiyakara	Cancer - Liver	1	No	Patients who were diagnosed with HCC according to the AASLD guidelines	The controls were selected from hospital staff and relatives of patient who were not involved in the study	Healthy controls were matched for age, sex and smoking history Control samples were collected within one day from the matched HCC sample to mnimize the differene between the scents from aging Control samples were collected in the outpatients waiting room in the same manner as the collection of HCC samples	UC	127	UC	UC	37	UC	HCC patients were never re-samples for testing to prevent the dog from remembering individal scents	UC
2017	Guirao-Montes	Cancer - Lung	UC	UC	Lung cancer	Healhy subjects + patients without LC	No: Patients in the LC group were older Gender distribution was similar between groups	UC	20	UC	UC	65	11(patietns without LC)+17 (healthy subjects)	Yes	UC
2017	Bryce	Clostridium difficile	1	No	Cultures & Faecal, PCR positive	Not infected	Yes	UC	UC	UC	75	UC	UC	UC	PCR
		Clostridium difficile	1	No	Cultures & Faecal, PCR positive	Not infected	Yes	UC	UC	UC	53	UC	UC	UC	PCR
2017	Koivusalo	Methicillin-resistant Staphylococcus aureus	NA	NA	Canadian MRSA-2 (SCCmec type II, USA100) and Canadian MRSA-10 (SCCmec type IV, USA300)	S. aureus ATCC® 25923™ (MSSA), a clinical isolate of MRSE, and SCCmec (Type I) remnant MSSA (MSSAr)	Yes	UC	UC	UC	UC	UC	UC	UC	Culture
2018	In-Seok Seo	Cancer - Breast	Cellspurchased from ATCC	Cellspurchased from ATCC	The cancerous cells cultivated in this study were 4T1 (mammary carcinoma cells) and CT26 (colorectal carcinoma cells) using mouse cells purchased from ATCC. These cancerous cells were cultivated in cell culture dishes (100 mm) filled with DMEM (Dulbecco modified Eagle’s medium) containing 10% FBS (fetal bovine serum) and 1% penicillin/streptomycin (Invitro- gen, Grand Island, NY), at 5% CO2, 95% …	four samples such as two culture liquid samples used in the cul- tivation of primary cell isolated from mammary and colorectal tissue of noncancerous female mice, one culture liquid sample unused for culture except the cancer cells and primary cells and one empty sample.	yes : To rule out possibility that the detection dogs would become aware of the excipients, all the culture liquid used in the cancer cell and primary cell culture were contained exactly identical components, and cultured under the same culture conditions (temperature and humidity) as the cancerous cells for 4 days	UC	UC	UC	UC	320	1280	All the samples used in the experiment were used only once	UC
		Cancer - Colorectal	Cellspurchased from ATCC	Cellspurchased from ATCC	The cancerous cells cultivated in this study were 4T1 (mammary carcinoma cells) and CT26 (colorectal carcinoma cells) using mouse cells purchased from ATCC. These cancerous cells were cultivated in cell culture dishes (100 mm) filled with DMEM (Dulbecco modified Eagle’s medium) containing 10% FBS (fetal bovine serum) and 1% penicillin/streptomycin (Invitro- gen, Grand Island, NY), at 5% CO2, 95% …	four samples such as two culture liquid samples used in the cul- tivation of primary cell isolated from mammary and colorectal tissue of noncancerous female mice, one culture liquid sample unused for culture except the cancer cells and primary cells and one empty sample.	yes : To rule out possibility that the detection dogs would become aware of the excipients, all the culture liquid used in the cancer cell and primary cell culture were contained exactly identical components, and cultured under the same culture conditions (temperature and humidity) as the cancerous cells for 4 days	UC	UC	UC	UC	320	1280	All the samples used in the experiment were used only once	UC
2018	Fischer-Tenhagen	Cancer - Lung	1	No	Breath samples of patients were taken on the first visit in the lung clinic for diagnosis, patients were not on any cancer treatment	Control persons were matched concerning age, sex and smoking habits	Yes (Controp persons were matched concerning age, sex and smoking habits)	41	21	20	19	9	10	Fleece tube training samples were used multiple times Fleece tube testing samples were used up to	UC
2018	Pacik	Cancer - Prostate	1 laboratory to create artificial medium	No	Artificial urine medium with sarcosine	Artificial urine medium without sarcosine	Yes	UC	UC	UC	180	60	120	No	UC
2018	Thuleau	Cancer - Breast	1	No	Breast cancer	Healthy volunteers	No (age)	UC	UC	UC	87	36	51	Yes	Mammography
2018	Maureen T. Taylor	Clostridium difficile	1	No	Positive samples were identified as being positive for both glutamate dehydrogen- ase (GDH) enzyme immunoassay (EIA) positive using C. DIFF CHEK-60 test (TechLab, Blacksburg, VA) and illumigene C difficile deoxyribonucleic acid amplification assay (Meridian Bioscience, Cincinnati, OH)	Negative controls consisted of equal proportions of GDH EIA-positive, gene amplification-negative and GDH EIA- negative, gene amplification-negative samples	UC	UC	UC	UC	300	90	210	No	Culture
2018	Edwards	Tuberculosis	28 clinics in Tanzania and 14 clinics in Mozambique	Yes	Sputum samples from tuberculosis patietns	Sputum samples from healthy volunteers	UC	UC	Between 2% and 4%	Between 96 and 98%	UC	UC	UC	UC	Culture
2019	Schoon	Cancer - Colorectal	1	No	Colorectal cancer	Healthy individuals (Samples from patients with other colon problems such as benign tumors, Crohn’s disease or celiac disease were not included in this study)	Not fully age and gender matched	UC	UC	UC	UC	UC	UC	No	UC
2019	Biehl	Cancer - Lung	2	Yes	Cancer patients were included irrespective of their stages of cancer (if chemotherapy was planned) either before chemotherapy or at least one year after having finished chemotherapy with the residual tumor	Healthy volunteers	UC	161	71	90	44	9	35	UC	UC
2019	Feil	Cancer - Lung	UC	UC	Lung cancer	Healthy individuals with no cancer history	UC	186	36	150	246	41	205	No	Biopsy
		Cancer - Lung	UC	UC	Lung cancer	Healthy individuals with no cancer history	UC	186	36	150	246	41	205	No	Biopsy
2019	Guirao	Cancer - Lung	2	Yes	Lung cancer, with solitary pulmonary nodules	Healthy individuals, & COPD	UC	UC	UC	UC	109	30	79	UC	Computed tomography (CT) of the chest
2019	Junqueira	Cancer - Lung	NA	NA	The serum samples of patients with newly diagnosed lung cancer were purchased from Boston BioSource. The serum was selected because of its commercial availability and confidence level that the serum was from patients who recently received a new diagnosis of NSCLC but had not started any treatment	Control samples were obtained from healthy male and female donors through Boston BioSource	UC	UC	UC	UC	50	10	40	YES : controls for testing came from controls for training	UC
2019	Murarka	Cancer - Ovarian	NA	NA	Cancer cell lines	Fallopian tube (FT) cell lines (FT190 and FT194), associated media without cells, and sterile filter paper	UC	UC	UC	UC	UC	UC	UC	UC	Cell lines
2019	Protoshhak	Cancer - Prostate	UC	UC	Patients with biopsy-proven prostate cancer	Healthy young men	UC	66	42	24	110	70	40	UC	Biopsy
2019	Chen Li	Clostridium difficile	1	1	C. Difficile areas	Non contaminated aread	Yes	UC	UC	UC	659	UC	UC	NA	UC
2019	Guest	Malaria	NA	NA	Malaria-positive individuals, assessed by microscopy	Uninfected children who were randomly selected (qPCR negative individuals)	Yes	UC	UC	UC	175	30	145	UC	Microscopy & qPCR
2020	Shoko Kure	Cancer - Breast	2	Yes	Patients histologically diagnosed with primary breast cancer	Non-breast malignant diseases and healthy volunteers	Yes	UC	UC	UC	200	40	160	No	Biopsy
2020	Yamamoto	Cancer - Cervical	2	Yes	Cases of cervical cancer and cases of cervical intraepithelial neoplasia grade 3	Uterine benign diseases, and healthy volunteers	Yes	UC	UC	UC	195	83	112	UC	Biopsy
2020	Mazzola	Cancer - Lung	2 (Lodi and Milan) of the Department of Veterinary Medicine, University of Milan, Italy	Yes	Oncological patients were subjects of both sexes, aged between 50 and 80, all diagnosed with LC by conventional bioptic methods and scheduled for lung resection	Healthy eligible participants were subjects of both genders, aged between 50 and 80, without a referred history of oncological findings confirmed by a recent (within the last 6 months) negative chest x-ray or Computed Thomography scan, and selected as the control group.	Yes: (table 2 - comparison age/sex are concordant between patients and healthy subjects)	202	118	84	66	11	55	No	UC
2020	Grandjean	COVID-19	5	Yes	Symptomatic COVID-19 positive individuals (SARS-CoV-2 PCR positive)	Asymptomatic COVID-19 negative individuals	No (symptoms, no age matched)	UC	UC	UC	UC	UC	UC	Yes	PCR
2020	Jendrny	COVID-19	2	Yes	Hospitalised COVID-19 patients that showed clinical symptoms and were diagnosed as SARS- CoV-2 positive	SARS- CoV-2 RT-PCR negative people with no previous history of COVID-19, nor had the individuals any history of a recent cold or infection	No	UC	UC	UC	14	7	7	UC	PCR
2020	Vesga	COVID-19	UC	UC	SARS-COV2 positive - hospitalized COVID-19 patients	Healthy human subjects confirmed negative by rRT-PCR testing - asymptomatic volunteers	No (symptoms)	UC	UC	UC	113	12	101	UC	PCR
2021	Guest	Cancer - Prostate	1	No	Gleason 9 prostate cancer biopsy-confirmed patients	Biopsy-negative controls	Yes	20	5	15	28	7	21	No	Biopsy
2021	Eskandary	COVID-19	UC	Yes	Cases hospitalized	Healthy individuals	No (symptoms)	UC	UC	UC	80	26	54	UC	PCR
		COVID-19	UC	Yes	Cases hospitalized	Healthy individuals	No (symptoms)	2600	1300	1300	120	50	70	UC	PCR
2021	Essler	COVID-19	UC	Yes	Covid positive, hospitalized	Asymptomatic, healthy volunteers	No (symptoms)	UC	UC (several types)	UC (several types)	UC	UC	UC	UC	PCR
2021	Grandjean	COVID-19	12	Yes	Symptomatic COVID‐19 individuals (SARS‐CoV‐2 PCR positive)	Asymptomatic COVID‐19 negative individuals (SARS‐CoV‐2 PCR negative)	No (symptoms)	UC	UC	UC	261	151	110	UC	PCR
2021	Guest	COVID-19	UC	Yes	SARS-CoV-2 real-time RT-PCR positive	SARS-CoV-2 RT-PCR negative	Yes	UC	UC	UC	400	200	200	No	PCR
2021	Jendrny	COVID-19	UC	UC	Subjects (hospitalised and non-hospitalised SARS-CoV-2 infected individuals) suffering from asymptomatic to severe COVID-19 symptoms	Negative SARS-CoV-2 RT-PCR result and healthy condition (negative control samples) or negative SARS-CoV-2 RT-PCR result and symptoms of other respiratory disease (distractor samples).	Yes	UC	12	UC	UC	UC	UC	UC	PCR

## Sheet: Table 3 - Samples
Table 3 - Samples characteristics
Year	1st author	Disease	Sample / Body fluid	Material for sampling	Sampling protocol	Sample conservation	Sample conservation T°C	T°C type (RT / Cold / Freeze)	Conservation - absence of light	Conservation - Duration
2004	Willis	Cancer - Bladder	Urine	Glass vials	After urinalysis (Multistix 10 SG, Bayer Corporation, NY, USA), we refrigerated fresh urine specimens within 45 minutes and froze them 2-32 hours later as 0.5 ml aliquots in glass vials.	Stored at − 40°C for up to five months	-40°C	Freeze	Yes	5 months
2004	Pickel	Cancer - Melanoma	Tissue	None	UC	Residual tissues from histopathological examination were combined, wrapped in gauze and frozen at −80 ◦C. Just prior to each 20 min training session, the BSM sample was thawed	UC	Freeze	Yes	UC
		Cancer - Melanoma	Human	None	None	None	None	None	Yes	None
2006	McCulloch	Cancer - Breast	Breath	Cylindrical polypropylene organic vapor sampling tube (Defencetek, Pretoria, South Africa). Each tube is open at either end, is 6 inches long, has an outer diameter of1 inch, has an inner diameter of 0.75 inches, and has removable end caps. A removable 2-inch-long insert of silicone oil-coated polypropylene “wool” captures volatile organic compounds in exhaled breath as breath passes through the …	Donors were asked to exhale 3 to 5 times through the tube	Tubes fitted with their end caps and sealed in ordinary grocery store Ziplock-style bags at room temperature	Room Temperature	RT	Yes	Sample storage time varied between 1 and 60 days
		Cancer - Lung	Breath	Cylindrical polypropylene organic vapor sampling tube (Defencetek, Pretoria, South Africa). Each tube is open at either end, is 6 inches long, has an outer diameter of1 inch, has an inner diameter of 0.75 inches, and has removable end caps. A removable 2-inch-long insert of silicone oil-coated polypropylene “wool” captures volatile organic compounds in exhaled breath as breath passes through the …	Donors were asked to exhale 3 to 5 times through the tube	Tubes fitted with their end caps and sealed in ordinary grocery store Ziplock-style bags at room temperature	Room Temperature	RT	Yes	Sample storage time varied between 1 and 60 days
2008	Gordon	Cancer - Breast	Urine	Nunc cryo vials	Consenting patients provided a random urine sample at enrollment. The urine sample was divided into 1-mL aliquots in Nunc cryo vials	Early in the study the samples were frozen, stored, and then thawed prior to placing the aliquots into the Nunc vials (Nalge Nunc International, Rochester, NY) and the vials into mason jars. The latter were labeled with a subject number and as breast, prostate, or no cancer. The jars were stored at least to -20°C until they were distributed to the trainers to keep in standard freezers they had at…	-20°C	Freeze	Yes	Storage time range was from a week to about 5 months
		Cancer - Prostate	Urine	Nunc cryo vials	Consenting patients provided a random urine sample at enrollment. The urine sample was divided into 1-mL aliquots in Nunc cryo vials	Early in the study the samples were frozen, stored, and then thawed prior to placing the aliquots into the Nunc vials (Nalge Nunc International, Rochester, NY) and the vials into mason jars. The latter were labeled with a subject number and as breast, prostate, or no cancer. The jars were stored at least to -20°C until they were distributed to the trainers to keep in standard freezers they had at…	-20°C	Freeze	Yes	Storage time range was from a week to about 5 months
2008	Horvath	Cancer - Ovarian	Tissue	NA	Each tumor was divided into 10-30 samples of about 3 x 3 x 3 mm for use in the exercises. Tumors were thawed to room temperature for 15-30 minutes before being used in the training. The tumors and the similar-sized normal control samples were kept and treated in separate rooms under almost sterile conditions to eliminate the possible mixing of different odor compounds.	The tumors were kept at -80°C in our tumor bank	-80°C	Freeze	Yes	UC
2009	Bart Jan Christiane Weetjens	Tuberculosis	Sputum	NA	UC (sputum collection)	Sterile phosphate buffered saline (5 ml) was added into each sputum sample and inactivated by heating at 90°C in a water bath for 30 min;the sample was then frozen (at –20°C) until the day of evaluation. This procedure was undertaken to protect the staff from exposure to live bacteria	-20°C	Freeze	Yes	UC
2010	Horvath	Cancer - Ovarian	Tissue	Plastic tubes	Tumour material was collected at primary surgery, before chemotherapy. It was taken from the primary tumour in the pelvis (from the ovarium if possible, at early stages) but not from the peritoneum	The tumour samples were stored in small plastic tubes, preserved immediately at -20°C, and transported to our tumour bank, where they were kept at -80°C. Each tumour was divided into 10-30 samples ofabout 3mm×3mm×3mm, and thawed at room temperature for 15-30 minutes before being used in the training	-80°C	Freeze	Yes	UC
		Cancer - Ovarian	Plasma	EDTA tubes	Samples were taken in EDTA tubes, then centrifuged at 3000 rpm for 10 min. and plasma pots over the small plastic tubes.	The rest of the plasma samples after undergoing CA-125 analysis, were kept at -80°C in our tumour bank	-80°C	Freeze	Yes	UC
2010	Cornu	Cancer - Prostate	Urine	UC	Urine was collected during the first consultation after digital rectal examination	The samples were frozen at -4°C from the time of urine collection to the time of testing. Each urine sample was slowly heated to 37°C with the same material immediately before examination in a dedicated area outside the testing room.	-4°C	Freeze	Yes	UC
2011	Willis	Cancer - Bladder	Urine	Glass vials	Following urinalysis (Multistix 10 SG, Bayer Corporation, NY, USA), fresh urine specimens were refrigerated within 45 minutes and frozen, 1–24 hours later, as 0.5 ml aliquots in glass vials.	Stored at −80◦C at Amersham Hospital for up to 6 months, and then transferred to the dog training centre where they were stored at −40◦C until required	-80°C & -40°C	Freeze	Yes	UC
2011	Sonoda	Cancer - Colorectal	Stool	NA	A 50 ml watery stool sample was obtained by suction during colonoscopy using a trachea aspirator kit (Sumitomo Company, Tokyo, Japan) between the rectum and descending colon and preserved at -80°C until filtration. The sample was filtered with qualitative filter paper No. 2 (diameter 110 mm; Tokyo Roshi Kaisha, Tokyo, Japan) and further filtered by Millex GP filter (pore size 0.22 mm, diameter 33…	-20°C	-20°C	Freeze	Yes	UC
		Cancer - Colorectal	Breath	Breath sampling bag (Otsuka Pharmaceutical Company, Tokyo, Japan).	Each subject exhaled between 100 and 200 ml into a breath sampling bag.	The bags were then fitted with their end caps and sealed in ordinary grocery store Ziploc-style bags at 4°C until presentation to the dog	4°C	Cold	Yes	UC
2012	Buszewski	Cancer - Lung	Breath	Disposable polypropylene sampling tubes (Defencetek, Pretoria, South Africa) 15 cm long and 3 cm in diameter	Exhaling 2 or 3 times through disposable polypropylene sampling tubes	UC	UC	UC	UC	UC
2012	Ehmann	Cancer - Lung	Breath	Cylindrical glass tubes (Gabner Glastechnik GmbH, Munich, Germany) that could be closed using removable end caps (rubber) were obtained (12 cm length, 2.2 cm inner diameter; fig. 2a). The lumen of the glass tube was filled with a polypropylene fleece (Asota GmbH, Linz, Austria) that was impregnated with a silicone oil to have either hydrophilic or hydrophobic absorbing properties (CHT R. Beitlich…	Each participant exhaled five times through the tube, holding it in their bare hands	The tubes were capped, labelled and stored at room temperature in a light-tight cabinet until testing.	RT	RT	Yes	UC
2012	Walczak	Cancer (several)	Breath	Polypropylene sampling tubes (Defencetek, Pretoria, South Africa)	The scent samples were taken by subjects exhaling 2-3 times through disposable polypropylene sampling tubes (Defencetek, Pretoria, South Africa), 15 cm long and 3-cm diameter, equipped with caps at either end. There were removable insertions filled with cotton absorbent inside the tubes.	Sampling tubes were sealed and wrapped in clean (unused) plastic bags to avoid permeation of odors from ambient air. Before use, the tubes were stored in a laboratory room. The tubes were unsealed only for 15-20 seconds during taking samples and then for approximately 1 hour during testing	RT	RT	Yes	UC
2012	Bomers	Clostridium difficile	Stool	Wooden sticks & culture plates	Wooden sticks were placed over the sample to absorb the scent emanating from the culture plates	UC	UC	UC	UC	UC
		Clostridium difficile	Patients	NA	NA (patients)	NA	NA	NA	NA	NA
2012	Georgies F Mgode	Tuberculosis	Sputum	NA	UC (sputum collection)	Sterile phosphate buffered saline (5 ml) was added into each sputum sample and inactivated by heating at 90°C in a water bath for 30 min;the sample was then frozen (at –20°C) until the day of evaluation. This procedure was undertaken to protect the staff from exposure to live bacteria	-20°C	Freeze	Yes	UC
2012	Mahoney	Tuberculosis	Sputum	NA	UC (sputum collection)	Sterile phosphate buffered saline (5 ml) was added into each sputum sample and inactivated by heating at 90°C in a water bath for 30 min;the sample was then frozen (at –20°C) until the day of evaluation. This procedure was undertaken to protect the staff from exposure to live bacteria	-20°C	Freeze	Yes	7 days
2013	Horvath	Cancer - Ovarian	Plasma (serie 1)	EDTA tubes	Blood samples were collected in EDTA tubes, and then centrifuged at 3000 rpm for 10 min with plasma pots over the small plastic tubes. After centrifugation, the plasma was divided into two parts, one for CA-125 analysis and the other for subsequent experiments. The latter part was kept at −80°C in the tumor bank	Kept at −80°C in the tumor bank	-80°C	Freeze	Yes	UC
		Cancer - Ovarian	Plasma (serie 2)	EDTA tubes	Blood samples were collected in EDTA tubes, and then centrifuged at 3000 rpm for 10 min with plasma pots over the small plastic tubes. After centrifugation, the plasma was divided into two parts, one for CA-125 analysis and the other for subsequent experiments. The latter part was kept at −80°C in the tumor bank	Kept at −80°C in the tumor bank	-80°C	Freeze	Yes	UC
2014	Amundsen	Cancer - Lung	Breath	Sterile exhalation filters (Breating Filter Allegro ID 547468, Allegro Medical Inc, US)	Exhaled breath for the olfactory test were collected from the subjects before performing bronchoscopy and at least four hours after oral intake or tobacco smoking (range 4 – 12 hours). The patients exhaled air (three forced expirations) through sterile exhalation filters (Breating Filter Allegro ID 547468, Allegro Medical Inc, US).	Filters were transferred to cool storage in specially cleaned and sealed containers. The filters were placed into these containers at room temperature one hour before the olfactory test.	RT	RT	UC	4 weeks maximum
		Cancer - Lung	Urine	Cryotubes	Urine used for the olfactory test were collected from the subjects before performing bronchoscopy and at least four hours after oral intake or tobacco smoking (range 4 – 12 hours).	The urine was frozen at -20°C	-20°C	Freeze	Yes	4 weeks maximum
2014	Rudnicka	Cancer - Lung	Breath	Cylindrical polypropylene tubes 14cm long, outer diameter 3 cm (Defencetek, Pretoria, South Africa) with removable inserts filled with oil-coated polypropylene absorbent	Three deep exhalations into sampling tubes	Tubes were fitted with their end caps and wrapped into sterile plastic bags and stored in room temperature between the time of breath sampling and presentation to the dogs	RT	RT	UC	UC
2014	Elliker	Cancer - Prostate	Urine	50 ml polypropylene screw-cap tubes	All samples were collected using the same protocols, at the same locations and by the same research team to ensure they had the same general background odour. Urine samples were collected in 50 ml polypropylene screw-cap tubes and frozen at −20°C within 10 minutes.	Samples were transported to the testing centre on dry ice, defrosted in a 37°C water bath, aliquoted into 1.5 ml polypropylene micro-centrifuge tubes and stored in a freezer at −20°C. Samples were generally stored for 1 to 60 days prior to presentation to the dogs, though some were stored for up to 6 months.	-20°C	Freeze	Yes	6 months
2014	Bomers	Clostridium difficile	Patients	NA	NA (patients)	NA	NA	NA	NA	NA
2015	Rudnicka	Cancer - Lung	Breath	Cylindrical polypropylene tubes 14 cm long, outer diameter 3 cm (Defencetek, Pretoria, South Africa) with removable inserts filled with oil-coated polypropylene absorbent	3 deep exhalations into sampling tubes	The tubes were fitted with their end caps and wrapped into sterile plastic bags and store in room temperature between the time of breath sampling and presentation to the dogs	RT	RT	UC	UC
2015	Taverna	Cancer - Prostate	Urine	Sterile urine container	For each subject a urine sample of approximately 30 ml was spontaneously collected before prostate biopsy or radical prostatectomy in a sterile urine container	Stored at -20C until use	-20°C	Freeze	Yes	UC
2015	Taverna	Cancer - Prostate	Urine and serum	Sterile urine container	A urine sample (roughly, 15 ml) was collected prior toradical prostatectomy, as well asduring successive follow-up (45 days and every 6 months) in a sterile urine container	After sampling samples were immediately stored at -20°C. These samples were then transported at controlled temperatures to the CEMIVET and stored at -20°C until used	-20°C	Freeze	Yes	UC
2015	Urbanova	Cancer - Prostate	Urine	UC	Urine was obtained by spontaneous micturition	Urine was stored in disposable test tubes and, after being transported to the Clinic of Dog and Cat Diseases at the Veterinary and Pharmaceutical University in Brno, the samples were stored in freezing boxes at a temperature of -20 °C until required	-20°C	Freeze	Yes	UC
2015	Yoel	Cancer (several)	Cell culture	The cell cultures were prepared in cell culture plates with a diameter of 5 cm	Cell cultures, in lab	The cell cultures were stored at 4°C, up to 24 hours, until the training began	4°C	Cold	Yes	24h
2015	Reither	Tuberculosis	Sputum	NA	UC (sputum collection)	Sterile phosphate buffered saline (5 ml) was added into each sputum sample and inactivated by heating at 90°C in a water bath for 30 min;the sample was then frozen (at –20°C) until the day of evaluation. This procedure was undertaken to protect the staff from exposure to live bacteria	-20°C	Freeze	Yes	UC
2016	Hackner	Cancer - Lung	Breath	Bags made from polyethylene (PE) tubes (mouthpieces) and high-density polyethylene foil with −40°C to 140°C food storage compliance.	Participants were asked to inflate sample bags made from polyethylene (PE) tubes (mouthpieces) and high-density polyethylene foil with −40°C to 140°C food storage compliance. A total volume of 5 l was obtained with normal breathing, and several exhalations were allowed. The complete volume of each breath gas sample was transferred through active charcoal adsorption tubes (Dräger AG, Lübeck, Germa…	After tubes were sealed with the original caps, they were stored in screw- capped eprouvettes at −18 °C. Prior to any access to the tubes, the sealed eprouvettes were accommodated to 20 °C for 24 h. Resealing was performed with fresh eprouvettes before refrigeration	-20°C	Freeze	Yes	UC
2016	Willis	Cancer - Melanoma	Skin	100% cotton gauze pads	Volatile organic compounds were collected from patients, immediately prior to excision or biopsy of their lesion, using 100% cotton gauze pads (plain sterile gauze swabs BP [12 ply], Synergy Health, Chorley, Lancashire, UK), cut to size and applied directly to the surface of the lesion. Overlaid on top of the gauze to prevent VOC loss into the atmosphere were slightly larger pieces of low odour N…	Pads were placed immediately in 7 mL, screw neck, amber glass vials (SCHOTT; Adelphi Healthcare Packaging, Haywards Heath, West Sussex, UK), closed with 18 mm black urea caps with foil liners (Wheaton UK Ltd., Rochdale, UK), frozen and stored at -40 oC until required	-40°C	Freeze	Yes	UC
2016	Maurer	UTI	Urine	Urine (1 mL) was placed in a 2-mL CryoTube vial (Thomas Sci- entific	UC	Samples were kept under continuous refrigeration until used	1.11–3.33°C	Cold	Yes	UC
2017	Guerrero-Flores	Cancer - Cervical	Tissue: biopsies Smear samples Surgical bandages	Smear: 50 mL Falcon tube Fresh biopsy Surgical bandages	Biopsies sectioned and paraffin embedded. Hematoxylin and eosin (H&E) stained sections were analyzed to confirm tumor presence of at least 50% per sample, including squamous cervical carcinoma and adenocarcinomas. The first scrape of smear sam- ples was obtained using a cervical brush for routine cytological examination while the remaining material was deposited in 50 ml Falcon tube. First round …	UC	UC	UC	UC	UC
2017	Kitiyakara	Cancer - Liver	Breath	Normal earloop face masks (3M)	Breaths collected using facemasks Process repeated twice so that there were 2 masks per patient in the Ziploc bag	After 10 mins the face mask was carefully taken off and placed into a Ziploc® bag	Room temperature	RT	Yes	on median:8 days of storage for HCC
2017	Guirao-Montes	Cancer - Lung	Breath	Exhaled gas collected in a 15-cm cylinder-like glass tube open on both ends and filled with 2 wool layers, one of them hydrophobic and the other one hydrophilic. The tubes were then hermetically sealed with silicone caps.	Participants refrained to eat and smoke 30 min before sampling.	UC	UC	UC	UC	Max 3 months
2017	Bryce	Clostridium difficile	Cultures & Faeces	Cotton gauze	C.difficile culture odours were prepared using a 10 µl loop of C.difficile colonies from clinical toxigenic strains suspended in 1 ml of normal saline and deposited on the bottom of a sterile urine container. The open container was then placed in a large glass jar with cotton gauze squares suspended above. Negative training and test materials consisted of cotton gauze suspended above one ml of no…	UC	UC	UC	UC	UC
		Clostridium difficile	Cultures & Faeces	Cotton gauze	C.difficile culture odours were prepared using a 10 µl loop of C.difficile colonies from clinical toxigenic strains suspended in 1 ml of normal saline and deposited on the bottom of a sterile urine container. The open container was then placed in a large glass jar with cotton gauze squares suspended above. Negative training and test materials consisted of cotton gauze suspended above one ml of no…	UC	UC	UC	UC	UC
2017	Koivusalo	Methicillin-resistant Staphylococcus aureus	Cultures	Culture plates	Isolates were inoculated onto fresh 5% sheep blood agar plates (BAP) in a set pattern and incubated at 37 °C in 5% CO2 in sealed plastic bags to prevent cross-contamination of odours	Incubated at 37°C	NA	NA	NA	NA
2018	In-Seok Seo	Cancer - Breast	Cell culture using mouse cells pruchaded from ATCC / Metabolic waste	Cancerous cells were cultivated in cell culture dishes (100mm) filled with DMEM containing 10% FBS and 1% penicillin/streptomycin at 5% CO2, 95% humidity and 37°C for 4 days	see sample preparation	5 ml microtubes	minus 70°C	Freeze	Yes	UC
		Cancer - Colorectal	Cell culture using mouse cells pruchaded from ATCC / Metabolic waste	Cancerous cells were cultivated in cell culture dishes (100mm) filled with DMEM containing 10% FBS and 1% penicillin/streptomycin at 5% CO2, 95% humidity and 37°C for 4 days	see sample preparation	5 ml microtubes	minus 70°C	Freeze	Yes	UC
2018	Fischer-Tenhagen	Cancer - Lung	Breath	An absorber technique using polypropylene fleece, developed on the basis of finding by Ehmann et al. (2011) was chosen for breath sampling. The sampling tubes dedicated for dog training and testing consisted of a glass tube (length: 150 mm, inner diameter: 18 mm) with GL25 sockets on both sides (Gaßner Glastechnik, Munich, Germany). Each tube was filled with two 70 mm × 43 mm polypropylene fleece…	Each patient donated two fleece tube samples with a resting time of 10 min in between	Samples were stored refrigerated at 8°C until use.	Samples were stored refrigerated at 8°C until use.	Cold	Yes	UC
2018	Pacik	Cancer - Prostate	Artificially created urine samples (= the urine medium was based on the analyses of constituents in common human urine, of which the midpoint values of the ranges given for each component have been used.	Each batch was freshly prepared prior analysis as 0.5L of solutoin containing 250 mL of distilled water, 1.9 g of potassium chloride, 4.25 g of sodium chloride, 12.25 g of urea, 0.07 g of uric acid, 0.52 of magnesium sulphate heptahydrate, 0.52g of citric acid, 0.17 g of ascorbic acid, 0.59 of potassium dihydrogen phosphate, 0.17 g of calcium chloride, 0.0012 g of iron sulphate, 1.6 g of sodium s…	see Material for sampling	The resulting solution was separated into 5-mL aliquots in opaque tubes, and either non-spiked aliquots or aliquots spiked with sarcosine (0.1, 1.0, 10.0 µmol/L) were immediately transported to the Small Animal Clinic, Facutly of Veterinary Medicine. After 30 min of equilibration at room temperature, samples were prepared for subsequent olfactory analyses.	RT	RT	UC	immediately transported and used
2018	Thuleau	Cancer - Breast	Sweat	Sterile compress (polyester fibres, 15 × 15 cm)	Sleep with pad over the breast overnight, after a shower with a neutral soap	Sterilized glass jars kept at 18°C +/- 2°C in the dark	RT	RT	Yes	Up to 1 year
2018	Maureen T. Taylor	Clostridium difficile	Stool	Stool samples were applied to cellulose sponges inside scent detection vials, which have a fine mesh cap that allows for the odor to escape	All samples were obtained from clinical stool specimens received from the provincial public health laboratory	Samples were refrigerated for up to 56 days and were never frozen to ensure stability of toxin levels	UC	Cold	Yes	56 days
2018	Edwards	Tuberculosis	Sputum	UC	UC	UC	UC	UC	UC	UC
2019	Schoon	Cancer - Colorectal	Stool	NA	Scent samples were prepared by placing ca. 7 cm2 pieces of cotton wool (1/4 of cotton facial cleaning pads with a diameter of 6 cm) into the containers containing the thawed stool sample: one piece of cotton wool in each capped container. These were kept there for 15 minutes, then the stool samples were removed from the container and re-frozen.	The containers with the pieces of cotton were stored in the refrigerator and used for training the dogs the next day.	UC	Cold	Yes	1 day
2019	Biehl	Cancer - Lung	Breath	Charcoal filled glass tubes or earloop fleece masks	1 - Charcoal-filled glass tubes as carrier material (Draeger, L€ubeck, Germany), through which exhaled air collected in a plastic ball was slowly drawn 2 - fleece earloop masks (Henry Schein Medical GmbH, Hamburg, Germany) stored in plastic cups. For collection with fleece masks, participants had to breathe through them for 3–5 min Participants had to fasten and were asked not to brush their teet…	All samples were stored in plastic cups with a lid, put into zipper-bags and stored in the dark at 10 °C until further use in the following weeks	10°C	RT	Yes	A few weeks
2019	Feil	Cancer - Lung	Urine	UC	UC	Shock frozen	-80°C	Freeze	Yes	UC
		Cancer - Lung	Breath	UC	UC	Shock frozen	-80°C	Freeze	Yes	UC
2019	Guirao	Cancer - Lung	Breath	15 cm crystal cylinder tube opened on both ends and filled with hydrophilic and hydrophobic wool	Participants refrained from ingesting any food or drinks, as well as smoking, 30 min before they exhaled inside a 15 cm crystal cylinder tube opened on both ends and filled with hydrophilic and hydrophobic wool, sealed with silicon taps and stored until exposed to the dog, no longer than three months	UC	UC	UC	UC	3 months
2019	Junqueira	Cancer - Lung	Blood Serum	UC	The serum samples of patients with newly diagnosed lung cancer were purchased from Boston BioSource	Stored in a freezer at −30°C for 1 week before first use.	-30°C	Freeze	Yes	UC
2019	Murarka	Cancer - Ovarian	Cell lines	Whatman 90mm filter paper (Whatman 1004-090 Qualitative Filter Papers - Fisher Scientific)	To capture the cell odor, cells were seeded in 100mm tissue culture dishes and once the cells reached 80% confluency, the media was replaced with fresh media and a Whatman 90mm filter paper (Whatman 1004-090 Qualitative Filter Papers - Fisher Scientific) was placed into the lids of the tissue culture dish. The filter paper pieces were aseptically collected 24-hours later in a biological hood, cut…	Stored in 28.35g clear glass jars (SKS Bottle & Packaging Inc., Stock #40210010.02S) in a -80ºC freezer.	-80°C	Freeze	Yes	UC
2019	Protoshhak	Cancer - Prostate	Urine	UC	UC	UC	UC	UC	UC	UC
2019	Chen Li	Clostridium difficile	Free running	NA	NA	NA	NA	NA	NA	NA
2019	Guest	Malaria	Foot odor	Pair of ankle-length nylon socks (Blue Box Disposables, Doncaster, UK)	The team collected foot odours from Gambian school children aged 5–13 years with and without asymptomatic falciparum malaria. Each child was fitted with a pair of ankle-length nylon socks (Blue Box Disposables, Doncaster, UK) to wear overnight.	UC	UC	UC	UC	17 - 20 months
2020	Shoko Kure	Cancer - Breast	Urine	Paper cups	Urine samples of the participants were collected with paper cups (Harn cup laminate A, Nissho Sangyo, Tokyo, Japan), and transferred to sterile test tubes (Sterile SP tube, Eiken Chemical Co., Tokyo, Japan) and each test tube was sealed with a cap.	Stored at -20°C	-20°C	Freeze	Yes	UC
2020	Yamamoto	Cancer - Cervical	Urine	Paper cups	Spontaneously voided urine was collected into a paper cup (Harn cup laminate A; Nissho Sangyo Co., Ltd., Tokyo, Japan) one day prior to surgery or concurrent chemoradiotherapy, and then transferred into sterile test tubes (Sterile SP tube, Eiken Chemical Co., Tokyo, Japan).	Each test tube was sealed with a cap and then stored at −80 ◦C until 1 mL of the selected sample was used for the dog sniffing test.	-80°C	Freeze	Yes	6 months
2020	Mazzola	Cancer - Lung	Urine	The urines were placed in a sterile container (Pic Steril Box, Pikdare Srl, Como, Italy), refrigerated within 45 min and then stored and transported to the laboratory of the testing center on a portable electric freezer at −20°C	The samples were collected in the morning, directly into the Institute, with a volume of at least 25 mL. The urines were placed in a sterile container (Pic Steril Box, Pikdare Srl, Como, Italy), refrigerated within 45 min and then stored and transported to the laboratory of the testing center on a portable electric freezer at −20°C	In the laboratory, the samples were defrosted in a 37°C water bath, and aliquoted into 0,5 ml hermetically sealed polymeric tubes (Securitainer tube 29x63 mm, lot n. M609710, Nolato, Netherlands and Securitainer Closure 29 mm, lot n. M609615, Nolato, Netherlands) and subsequently frozen. Only the progressive number of the donor was marked on the white polymeric tubes. For presentation to the dogs…	-20°C	Freeze	Yes	UC
2020	Grandjean	COVID-19	Sweat	2x2-inch sterile gauze swabs used by the hospitals or sterile gauze filters used for explosive detection (provided by DiagNose comp.), and inert polymer tubes used for explosives, drugs or criminology detection (provided by Gextent)	One underarm sweat sample per individual was collected : The sampling material remained in contact with the skin for 20 minutes. The average amount ofsweat obtained is around 75 mg for both the gauze swab and the cellulosic filter	Samples were stored in hospital anti-UV sterile containers, disinfected by the sampler’s helper, coded (including left or right underarm), then placed into a second plastic envelope	18°C & 6°C	RT	Yes	UC
2020	Jendrny	COVID-19	Saliva or tracheobronchial secretions	Nasopharyngeal swab samples	Samples from COVID-19 patients were inactivated using beta propiolactone (BPL) in order to protect the dogs and their handlers from infection during training. Briefly, samples and reagents were kept at 4 °C, 20 μl/ml NaHCO3 (7.5%) was added, and samples were incubated for 10 min at 4 °C. After addition of 10 μl/ml of 10% BPL, samples were incubated at 4 °C for 70 to 72 h. Hydrolysis of BPL was co…	Cold	4°C	Cold	Yes	UC
2020	Vesga	COVID-19	Respiratory secretions	Flask	Three kinds of 2-mL specimens were prepared, under a biosafety class II laminar flow cabinet, using 212 sterile, scent-free flasks. One-hundred flasks had 0.9% sterile saline solution, 100 had rRT-PCR-negative saliva, and 12 flasks had COVID- 19 positive respiratory secretions. The saliva and respiratory secretions specimens were diluted (1:1 volume) in 0.9% sterile saline solution to preserve th…	All the specimens were stored in different refrigerators at 4ºC. During	4°C	Cold	Yes	UC
2021	Guest	Cancer - Prostate	Urine	NA	Clean catch urine specimens were obtained and transported for processing within 4 hours ofcollection. Unprocessed urine was aliquoted into 3 mL aliquots and stored at -80˚C until use in this study	Stored at -80°C	-80°C	Freeze	Yes	UC
2021	Eskandary	COVID-19	Throat and pharyngeal secretions	UC	UC	UC	UC	UC	UC	UC
		COVID-19	Breath & sweat	Clothes and masks	Face masks and clothes worn for 24 h before being used as samples	UC	UC	UC	UC	UC
2021	Essler	COVID-19	Urine and saliva	Cotton ball for saliva	Saliva : Participants were instructed to hold the cotton ball between the lower lip and teeth for approximately 60 seconds, spit the cotton ball back into the plastic container, and replace the container lid. For adult patients, saliva was collected by having individuals spit into a sterile collection cup|| Urine from all subjects was collected via clean catch into sterile sample cups. || The vir…	After sample inactivation, samples were stored at a minimum of-20˚C cold storage until aliquoting	-20°C	Freeze	Yes	UC
2021	Grandjean	COVID-19	Sweat	Getxent inert polymers tubes	Sweat samples were collected using Getxent inert polymers tubes positioned in direct contact with the skin (occasionally over the first layer of clothes) in the patient’s axilla for up to 20 minutes	The tubes were stored in tinted glass jars (to prevent UV ray damage) placed in individual biohazard bags. Samples were stored in boxes (keeping positive and negatives samples separate) in a refrigerator at 4°C until they were used for the dog training or validation sessions.	4°C	Cold	Yes	UC
2021	Guest	COVID-19	Breath & sweat	Breath: single-use protective disposable face mask (Fisher Scientific, UK); Skin odor : pair of nylon ankle socks (Retail Premium Grade Try-on Socks, Blue Box Socks, UK) and (t-)shirts, made from natural and synthetic materials	wear a face mask for 3 h, nylon socks and a shirt for 12 h	After collection, the odour samples were individually wrapped in aluminium foil and packaged in separate labelled polythene bags by the participant. At the point of return, collected samples were stored frozen ≥ -20oC	-20°C	Freeze	Yes	UC
2021	Jendrny	COVID-19	Saliva, sweat, urine	Sweat: Cotton pad	Saliva: Individuals had to salivate about 1-3 ml through a straw into sample tubes. Sweat: To generate sweat samples, the test persons had to wipe their crook of the arm with a cotton pad. Urine: Urine samples were collected from the test persons by urinating into a cup and transfer of 5 ml into a sample tube	After acquisition, all of the samples were deep-frozen at -80°C in the laboratory until usage	-80°C	Freeze	Yes	UC

## Sheet: Table 4 - Animals details
Table 4: Animals details
Year	1st author	Disease	Animal - class	Animals - number	Animal - breeds	Animal - Males	Animal - Females	Animal - Age (years)	Animal - prior experience	Animal - other uses in parallel	Animal - living conditions	Training type	Training duration	Training frequency	% animals selected successfully
2004	Willis	Cancer - Bladder	Dog	6	UC	UC	UC	UC	No	No	UC	Operant conditionning ; Positive reinforcement ; Clicker	7 month	UC	1
2004	Pickel	Cancer - Melanoma	Dog	2	Standard Schnauzer = 1 Golden Retriever = 1	1	1	4;6	Yes	UC	UC	UC	UC	UC	1
			Dog	2	Standard Schnauzer = 1 Golden Retriever = 1	1	1	4;6	Yes	UC	UC	UC	UC	UC	1
2006	McCulloch	Cancer - Breast	Dog	5	Labrador Retriver = 3 Portugues water dog = 2	3	2	7 to 18 months	No	Breast and lung cancer	Between training sessions, dogs were housed in clean, well-ventilated kennel crates appropriate for the size of each dog. Water was freely available, and high-value treats were provided during each morning’s training and testing session	Operant conditionning ; Positive reinforcement ; Clicker	3 weeks	4 trainings per day	5 dogs chose among 13, but no exclusion after they start program
		Cancer - Lung	Dog	5	Labrador Retriver = 3 Portugues water dog = 2	3	2	7 to 18 months	No	Breast and lung cancer	Between training sessions, dogs were housed in clean, well-ventilated kennel crates appropriate for the size of each dog. Water was freely available, and high-value treats were provided during each morning’s training and testing session	Operant conditionning ; Positive reinforcement ; Clicker	3 weeks	4 trainings per day	5 dogs chose among 13, but no exclusion after they start program
2008	Gordon	Cancer - Breast	Dog	6	Aussie cocker mix; Collie mix; German shepherd; Rhodesian ridgeback; Boxer; Italian greyhound	2	4	2; 8; 4; 5; 6.5; 5	No	No	UC (except that training was at home)	Operant conditionning ; Positive reinforcement ; Clicker	12–14 months	2-7/week	1
		Cancer - Prostate	Dog	4	Chihuahua mix; Miniature goldendoodle; Pembroke Welsh corgi; Border collie	0	4	4; 2.5; 6; 2	No	No	UC (except that training was at home)	Operant conditionning ; Positive reinforcement ; Clicker	12–14 months	2-7/week	1
2008	Horvath	Cancer - Ovarian	Dog	1	Riesenschnauzer	0	1	4	UC	No	UC	Operant conditionning ; Positive reinforcement	12 months	2 / week	1
2009	Bart Jan Christiane Weetjens	Tuberculosis	Rat	20	African giant pouched rats (Cricetomys gambianus)	UC	UC	1 month	No	No	Breeding kennels	Operant conditionning ; Positive reinforcement ; Clicker	6 months	UC	0.9
2010	Horvath	Cancer - Ovarian	Dog	1	Giant Schnauzer	UC	UC	3	No	No	UC	Operant conditionning ; Positive reinforcement	9 months	UC	1
		Cancer - Ovarian	Dog	1	Giant Schnauzer	0	1	7	Yes, with tissue samples (cf Horvath 2008)	No	UC	Operant conditionning ; Positive reinforcement	9 months	UC	1
2010	Cornu	Cancer - Prostate	Dog	1	Belgian Malinois shepherd	UC	UC	UC	No	No	French army	Operant conditionning ; Positive reinforcement ; Clicker	16-month	5d/week	1
2011	Willis	Cancer - Bladder	Dog	4	Working Cocker Spaniels = 2; Springer Spaniel = 1; Working Labrador = 1	3	1	8;6;5;6	Three dogs had been in training for over 4 years at the start of the test phase, whilst the fourth had received 6 months of training before testing began	No	UC	Operant conditionning ; Positive reinforcement ; Clicker	4 years (3 dogs); 6 months (1 dog)	4 times a week	1
2011	Sonoda	Cancer - Colorectal	Dog	1	Labrador retriver = 1	0	1	8	The dog was trained for water rescue beginning in 2003 and then began training as a cancer detection dog in 2005	No	UC	Operant conditionning ; Positive reinforcement	5 years	UC	1
		Cancer - Colorectal	Dog	1	Labrador retriver = 1	0	1	8	The dog was trained for water rescue beginning in 2003 and then began training as a cancer detection dog in 2005	No	UC	Operant conditionning ; Positive reinforcement	5 years	UC	1
2012	Buszewski	Cancer - Lung	Dog	UC	German sheperd mix	UC	0	21 months	UC	UC	UC	UC	UC	The trials with dogs were repeated approximately 30 times on different days	UC
2012	Ehmann	Cancer - Lung	Dog	4	German Sheperd = 2; Australian sheperd = 1; Labrador retriever = 1	2	2	2,5;2,5;3;3	No	No	Family dogs	Operant conditionning ; Positive reinforcement	6 months	UC	1
2012	Walczak	Cancer (several)	Dog	6	German shepherd = 5; Labrador retriever = 1	6	0	Months: 22;22;22;6;6;6	No	No	Dogs were housed in 4x4-m2 outdoor individual roofed kennels equipped with insulated chutes. They had access to open-air enclosures of 15x6m2. Animals were fed twice a day with standard dry dog food and had free access to fresh water. Two handlers trained and took care of the dogs for the length of the study	Operant conditionning ; Positive reinforcement ; Clicker	9 months	3-6 days/week	50% ||||| All older dogs completed the 3 phases of the training; however, younger dogs showed an apparent decrease of motivation for work during training phase III, with the result that only the older dogs were used in the working phase
2012	Bomers	Clostridium difficile	Dog	1	Beagle = 1	1	0	2	No	No	UC	Operant conditionning ; Positive reinforcement	2 months	UC	1
		Clostridium difficile	Dog	1	Beagle = 1	1	0	2	No	No	UC	Operant conditionning ; Positive reinforcement	2 months	UC	1
2012	Georgies F Mgode	Tuberculosis	Rat	10	African giant pouched rats (Cricetomys gambianus)	UC	UC	UC	Yes	No	Breeding kennels	Operant conditionning ; Positive reinforcement ; Clicker	UC	UC	UC
2012	Mahoney	Tuberculosis	Rat	10	African giant pouched rats (Cricetomys gambianus)	5	5	UC	Yes	No	Breeding kennels	Operant conditionning ; Positive reinforcement ; Clicker	UC	UC	UC
2013	Horvath	Cancer - Ovarian	Dog	2	Giant Schnauzer = 2	UC	UC	6;10	Yes	No	The dogs live as family pets with the owner and his family. There is free access to fresh water all day, and feeding three times a day. The dogs spend several hours each day in a garden or on walks	Operant conditionning ; Positive reinforcement	For 2 years prior to the present study, only once-a-week maintenance training was used.	1/week	1
		Cancer - Ovarian	Dog	2	Giant Schnauzer = 2	UC	UC	6;10	Yes	No	The dogs live as family pets with the owner and his family. There is free access to fresh water all day, and feeding three times a day. The dogs spend several hours each day in a garden or on walks	Operant conditionning ; Positive reinforcement	For 2 years prior to the present study, only once-a-week maintenance training was used.	1/week	1
2014	Amundsen	Cancer - Lung	Dog	4	Belgian sheperd = 1; Border collie = 1; Daschshund = 1; Rottweiler = 1	3	1	8;4;8;3	Yes (scent tracking)	If the dogs were used in between the two training sessions for tasks other than those involving our study, they were trained for at least four weeks before the next test session.	The dogs were handled with good care in agreement with the Helsinki convention for the use and care of research animals, in a certifi ed training centre with well-trained personnel	UC	UC	2-4/week	0.75
		Cancer - Lung	Dog	4	Belgian sheperd = 1; Border collie = 1; Daschshund = 1; Rottweiler = 1	3	1	8;4;8;3	Yes (scent tracking)	If the dogs were used in between the two training sessions for tasks other than those involving our study, they were trained for at least four weeks before the next test session.	The dogs were handled with good care in agreement with the Helsinki convention for the use and care of research animals, in a certifi ed training centre with well-trained personnel	UC	UC	2-4/week	0.75
2014	Rudnicka	Cancer - Lung	Dog	2	German sheperd mix = 2	2	0	UC	No	No	UC	Operant conditionning ; Positive reinforcement	UC	Daily	1
2014	Elliker	Cancer - Prostate	Dog	10	Seven different breeds	6	4	1-11 years old	No	No	Dogs were cared for by their owners between sessions	Operant conditionning ; Positive reinforcement ; Clicker	UC	UC	0.2
2014	Bomers	Clostridium difficile	Dog	1	Beagle = 1	1	0	5	Yes (previous study)	No	UC	Operant conditionning ; Positive reinforcement	UC	5/week	1
2015	Rudnicka	Cancer - Lung	Dog	2	German sheperd mix = 2	2	0	UC	No	No	UC	Operant conditionning ; Positive reinforcement	UC	Daily	1
2015	Taverna	Cancer - Prostate	Dog	2	German Shepherd = 2	0	2	3;3	Yes	Explosion Detection Dogs	UC	Operant conditionning ; Positive reinforcement ; Clicker	5 months	UC	1
2015	Taverna	Cancer - Prostate	Dog	2	German Shepherd = 2	0	2	3;3	Yes	Explosion Detection Dogs	UC	Operant conditionning ; Positive reinforcement ; Clicker	UC	UC	1
2015	Urbanova	Cancer - Prostate	Dog	1	German Shepherd bitch = 1	0	1	2	Yes	No	UC	Operant conditionning ; Positive reinforcement ; Clicker	11 months	4-5/week	1
2015	Yoel	Cancer (several)	Dog	2	Belgian Shepherd = 2	0	2	5;2	Yes	UC	UC	Operant conditionning ; Positive reinforcement	6 months	UC	1
2015	Reither	Tuberculosis	Rat	7	African giant pouched rats (Cricetomys gambianus)	UC	UC	UC	Yes	No	Breeding kennels	Operant conditionning ; Positive reinforcement ; Clicker	UC	UC	UC
2016	Hackner	Cancer - Lung	Dog	6	Golden Retriever = 1; Labrador = 1; Giant Schnauzer = 1; Large Munsterlander = 1; Havanese sheperd = 1; German Shepherd = 1	2	4	3y - 10y	Yes	No	UC	Operant conditionning ; Positive reinforcement ; Clicker	6 months	UC	1
2016	Willis	Cancer - Melanoma	Dog	2	Working labrador = 1	1	0	2	No	No	UC	Operant conditionning ; Positive reinforcement ; Clicker	13 months	4d/week	0.5
2016	Maurer	UTI	Dog	5	Labrador and Golden Retrievers = 5	UC	UC	1y-8y	No	No	UC	Operant conditionning ; Positive reinforcement ; Clicker	8 weeks	4d/week	1
2017	Guerrero-Flores	Cancer - Cervical	Dog	1	Beagle	1	0	3	Yes, formerly drug detection	No	During training, the beagle had his own cell to rest in, was allowed to play with other dogs without restriction and his regular diet composed of typical dog food remained the same.	Operant conditionning ; Positive reinforcement ; Clicker	4 months	Every 15 min 5days/week	1
2017	Kitiyakara	Cancer - Liver	Dog	1	Golden Retriever = 1	0	1	10	She had previously been trained and certified for 8 years by the International Rescue Dog Organization in search and rubble search, RH-T level B, as well as being qualified as Mobility Assistance K9 (for the disabled).	yes, search-and-rescue	With owner	Operant conditionning ; Positive reinforcement ; Clicker	UC	UC	1
2017	Guirao-Montes	Cancer - Lung	Dog	1	Cross-breed between a Labrador Retriever and a Pitbull = 1	1	0	3	UC	No	UC	Operant conditionning ; Positive reinforcement	UC	UC	UC
2017	Bryce	Clostridium difficile	Dog	1	Springer spaniel = 1	UC	UC	11 month	UC	UC	UC	Operant conditionning ; Positive reinforcement	UC	UC	1
		Clostridium difficile	Dog	1	Springer spaniel = 1	UC	UC	11 month	UC	UC	UC	Operant conditionning ; Positive reinforcement	UC	UC	1
2017	Koivusalo	Methicillin-resistant Staphylococcus aureus	Dog	1	Golden Retriever = 1	0	1	3	UC	UC	UC	Operant conditionning ; Positive reinforcement ; Clicker	1,5 years	2-3d/week	UC
2018	In-Seok Seo	Cancer - Breast	Dog	2	Cocker Spaniel English Springer Spaniel	2	0	Both 2 years	No prior experience	UC	The source ofthe dogs were the korea police dog training center, and the dogs were housed in kennels at hallym university During the training period, the dogs were maintained in a constant temperature (22±2˚C) and humidity (55±5%) facility, and were provided with feed twice per day	reward training	2 training sessions/day (30 minutes/session) for six months conducted by an explosive detection dog trainer from the national police in Korea	2 training sessions/day (30 minutes/session) for six months conducted by an explosive detection dog trainer from the national police in Korea	1
		Cancer - Colorectal	Dog	2	Cocker Spaniel English Springer Spaniel	2	0	Both 2 years	No prior experience	UC	The source ofthe dogs were the korea police dog training center, and the dogs were housed in kennels at hallym university During the training period, the dogs were maintained in a constant temperature (22±2˚C) and humidity (55±5%) facility, and were provided with feed twice per day	reward training	2 training sessions/day (30 minutes/session) for six months conducted by an explosive detection dog trainer from the national police in Korea	2 training sessions/day (30 minutes/session) for six months conducted by an explosive detection dog trainer from the national police in Korea	1
2018	Fischer-Tenhagen	Cancer - Lung	Dog	4	Labrador Poodle Dachshund Labrador mix	0	4	5 3 7 8	dogs had to be familiar with training and testing of odor discrimination procedures	UC	During the study the dogs lived in their familiar home	Training methods were based on positive reinforcement using a clicker as a secondary reinforcement and small food treats as reward and dogs were off leash during training and testing. Every dog was rewarded with its favorite food. In case of a wrong indication, a reward was not given and the dog had to pause for at least 1 min before repeating the trial. A minimum of 80% correct indications were …	18 months | Numbers of training days for the Labrador and the poodle were 73 and 82 days, respectively, with training trials (decision on a presented odor sample) ranging from 5 to 20 (average 15) per training day.	Training took place only once a week, dogs were not trained at the same time or same day	0.5
2018	Pacik	Cancer - Prostate	Dog	1	German shepherd dog	0	1	Traing start at 7 months of age	yes, scent work training	UC	UC	Postive reinforcement method using a clicker	× 4–5 per week for a period of 11 months.	In the course of a day, 1–2 training sessions were carried out, during which the dog was dispatched × 3–6 to check and evaluate one sample,	1
2018	Thuleau	Cancer - Breast	Dog	2	Belgian sheperd = 2	2	0	1,5;1,5	No	No	Dog center	Operant conditionning ; Positive reinforcement	5 months	5d/week	1
2018	Maureen T. Taylor	Clostridium difficile	Dog	2	German Sheperd = 1; Border collie = 1	UC	UC	3;3	UC	UC	UC	Operant conditionning ; Positive reinforcement	UC	UC	1
2018	Edwards	Tuberculosis	Rat	8	African pouched rats (Cricetomys ansorgei)	3	5	3.4, sd = 2.25	UC	UC	The rats had ad libitum access to fresh water outside of experimental sessions and were housed individually or in paris in 1-m^3 living cages equipped with running wheels, clay nesting chambers, wooden structures fro climbing and gnawing, and bedding material. To increase the reinfircing effectiveness of food provided in experimental sessions, rats were not fed prior to experimental sessions and …	Operant conditionning ; Positive reinforcement ; Clicker	UC	UC	1
2019	Schoon	Cancer - Colorectal	Dog	8	Nova Scotia duck tolling retriever = 1; Labrador x golden retriever = 3; English cocker spaniel = 3; Belgian Malinois = 1	1	7	8;7;6;6;6;5;3;3	UC	UC	The dogs were all kept in family homes and were present at the training location 2-3 times per week	Operant conditionning ; Positive reinforcement	UC	2,5d/week	1
2019	Biehl	Cancer - Lung	Dog	14	Golden Retriever = 1; German Shepherd = 1; Flat Coated Retriever = 1; Border Collie = 1; Beagle = 1; Labrador Retriever = 1; Jack Russell Terrier = 1; Gigant Schnauzer = 1; Crossbreed Dog = 6	7	7	4;8;5;3;4;2;3;1;1;3;7;7;8;8	Depends on the dogs	No	UC	Operant conditionning ; Positive reinforcement ; Clicker	UC	2d/week	0.285714
2019	Feil	Cancer - Lung	Dog	1	UC	UC	UC	UC	UC	UC	UC	UC	UC	UC	1
		Cancer - Lung	Dog	1	UC	UC	UC	UC	UC	UC	UC	UC	UC	UC	1
2019	Guirao	Cancer - Lung	Dog	1	Crossbreed between a Labrador Retriever and a Pitbull	1	0	4	Yes	No	UC	Operant conditionning ; Positive reinforcement	UC	UC	1
2019	Junqueira	Cancer - Lung	Dog	4	Beagle = 4	UC	UC	2;2;2;2	No	No	UC	Operant conditionning ; Positive reinforcement ; Clicker	8 weeks	UC	0.75
2019	Murarka	Cancer - Ovarian	Dog	3	German Sheperd = 3; Labrador = 1	1	3	2,5;1;4;4	Yes for 1/4	No	Working Dog Center during the day for training, and evenings and weekends with foster families in a home environment	Operant conditionning ; Positive reinforcement ; Clicker	UC	5d/week	0.5
2019	Protoshhak	Cancer - Prostate	Dog	2	Belgian Malinois = 2	UC	UC	UC	UC	UC	UC	UC	UC	UC	1
2019	Chen Li	Clostridium difficile	Dog	2	Springer spaniel = 2	UC	UC	3;4	Yes	No	UC	Operant conditionning ; Positive reinforcement	UC	Daily	1
2019	Guest	Malaria	Dog	2	UC	UC	UC	UC	UC	UC	UC	UC	UC	UC	UC
2020	Shoko Kure	Cancer - Breast	Dog	1	Labrador retriever = 1	0	1	9	Yes	UC	UC	Operant conditionning ; Positive reinforcement	UC	UC	1
2020	Yamamoto	Cancer - Cervical	Dog	1	Labrador retriever = 1	0	1	9	Yes (salvage)	UC	Kennel at the Cancer Sniffing Dog Training Center, St. Sugar Japan, in Tateyama City, Chiba, Japan	Operant conditionning ; Positive reinforcement	1 year	UC	1
2020	Mazzola	Cancer - Lung	Dog	6	2 Belgian Malinous Mixed-breed Helix dogs	0	3	5;3;3	No	The dogs were not used for other tasks during the study	All dogs were handled by professional dog trainers or behavioral scientists during the training and testing sessions and were cared for by their owners between sessions.	clicker training method	1 year, twice a week | The training has scheduled two test days per week, each with two sessions of at least six runs, depending on the dog’s motivation	he training has scheduled two test days per week, each with two sessions of at least six runs, depending on the dog’s motivation	3 out of 6 (50%)
2020	Grandjean	COVID-19	Dog	6	Belgian Malinois = 5; Jack russel terrier = 1	3	3	8;3;1,5;1,5;6;3	Yes	UC	UC	Operant conditionning ; Positive reinforcement	3 weeks	UC	0.428571
2020	Jendrny	COVID-19	Dog	8	Dutch Shepherd Mix = 1; Dutch Shepherd = 1; Labrador Retriever = 3; Cocker Spaniel = 1; Malinois = 2	5	3	9;12;5;3;2;3;0,5;6	It depends	No	UC	Operant conditionning ; Positive reinforcement	3 weeks	Every day	1
2020	Vesga	COVID-19	Dog	6	Belgian Malinois = 4; American Pit Bull Terrier = 1; Alaskan Malamute x Siberian Husky = 1	2	4	0,5;2;?;2,5;3;3	UC	No	UC	Operant conditionning ; Positive reinforcement ; Clicker	1 month	UC	1
2021	Guest	Cancer - Prostate	Dog	2	Labrador = 1; Wire Haired Hungarian Vizsla = 1	0	2	4;7	Yes	No	UC	Operant conditionning ; Positive reinforcement ; Clicker	UC	UC	1
2021	Eskandary	COVID-19	Dog	3	German shepherd =1; German black =1; Labrador =1	1	2	2;1,5;1,5	UC	No	The dogs were kept in standard cages under standard conditions and were fed with high-quality dog foods. It should be noted that no forceful training equipment were utilized.	Operant conditionning ; Positive reinforcement	7 weeks	UC	1
		COVID-19	Dog	3	Labrador =1; Border gypsy = 1; Golden retriever = 1	2	1	1;2;3	UC	No	The dogs were kept in standard cages under standard conditions and were fed with high-quality dog foods. It should be noted that no forceful training equipment were utilized.	Operant conditionning ; Positive reinforcement	7 weeks	UC	1
2021	Essler	COVID-19	Dog	9	Labrador = 8; Malinois = 1	4	5	2,5;2,5;2;2;1,5;1,5;2;2;6	UC	No	UC	Operant conditionning ; Positive reinforcement ; Clicker	UC	5d/week	1
2021	Grandjean	COVID-19	Dog	21	Malinois = 8; German Sheperd = 4; Labrador = 1; Cocker Spaniel = 6; Dutch Shepherd = 1; Pointer = 1	20	1	1;3;6;6;1;1;2;2;3;2;4;3;3;4;3;4;2;6;2;5;6;2	Yes for 19/21	No	UC	Operant conditionning ; Positive reinforcement	2 weeks	UC	1
2021	Guest	COVID-19	Dog	6	Cocker Spaniel = 1; Labrador = 4; Golden retriever = 1	4	2	8.4.5.4.4.3	UC	No	UC	Operant conditionning ; Positive reinforcement ; Clicker	6 weeks	UC	1
2021	Jendrny	COVID-19	Dogs	10	Malinois =5; Labrador Retriever = 3; German Shepherd =1; Dutch shepherd crossbreed =1	4	6	5;9;3;3;4;5;1;1;3;3	Yes	No	UC	Operant conditionning ; Positive reinforcement	2 weeks	UC	1

## Sheet: Table 5 - Test setting
Table 5 - Test settings
Year	1st author	Disease	Sample presentation / stations	Training / Test setting	Scent line up - Line or circle	Scent line up - Number of samples	Scent line up - Nb of positive samples	Scent line up - Possibility of blanks	Scent line up - Forced Choice vs UFC	Blinded (no / SB / DB1 / DB2)	Temperature	Hygrometry	Pressure
2004	Willis	Cancer - Bladder	Samples were defrosted and pipetted on to filter paper in Petri dishes (58 x 15 mm) and used either immediately in a wet state or within four weeks after overnight air drying and storage at room temperature.	1+6- : One investigator, working in a building separate from the dog testing area, prepared the test samples, labelling Petri dishes for each run with the letters A to G, from a randomly ordered list. Different investigators then placed the Petri dishes under single use, ventilated plastic pots, in positions (a minimum of 50 cm apart) along a floor grid numbered 1 to 7, by using a second random n…	Line	7	1	No	FC	DB2	UC	UC	UC
2004	Pickel	Cancer - Melanoma	Samples "planted" on healthy volunteers	10 samples "planted" on volunteers	Contact with human	10	0;1	Yes	UFC	DB1	UC	UC	UC
			Patients	Patients with bandages	Contact with human	UC	1	Yes	FC	DB1	UC	UC	UC
2006	McCulloch	Cancer - Breast	Each station consisted of a polypropylene plastic storage container measuring 15 in. long, 12 in. wide, and 10 in. tall. Each station also contained a well 8 in. deep within which we placed the breath sample tubes. To prevent the dog’s nose from touching the breath sample tubes, we placed the breath sample tubes in clear half-pint polypropylene containers measuring 4.5-in. wide by 1.5-in. tall an…	5 sample stations on the floor of the room in a single straight line spaced 1 yard apart	Line	5	1	No	FC	DB2	68°F to 75°F	UC	UC
		Cancer - Lung	Each station consisted of a polypropylene plastic storage container measuring 15 in. long, 12 in. wide, and 10 in. tall. Each station also contained a well 8 in. deep within which we placed the breath sample tubes. To prevent the dog’s nose from touching the breath sample tubes, we placed the breath sample tubes in clear half-pint polypropylene containers measuring 4.5-in. wide by 1.5-in. tall an…	5 sample stations on the floor of the room in a single straight line spaced 1 yard apart	Line	5	1	No	FC	DB2	68°F to 75°F	UC	UC
2008	Gordon	Cancer - Breast	Each Nunc cryo vial of urine was placed in a screw-top 20-mL Fisher (Thermo Fisher Scientific, Waltham, MA) brand scintillation vial. The latter were labeled A–G according to the test template --> Samples were placed in cup holders	1+/6-	Line	7	1	No	FC	DB2	UC	UC	UC
		Cancer - Prostate	Each Nunc cryo vial of urine was placed in a screw-top 20-mL Fisher (Thermo Fisher Scientific, Waltham, MA) brand scintillation vial. The latter were labeled A–G according to the test template --> Samples were placed in cup holders	1+/6-	Line	7	1	No	FC	DB2	UC	UC	UC
2008	Horvath	Cancer - Ovarian	Wooden boxes (25 x 25 x 25 cm) containing glass containers were used. Target and nontarget samples were placed in the glass containers, which were covered with perforated lids. Both the boxes and the containers were cleaned with hot water after each exercise	1+/4-, x2	Line	10	2	No	FC	DB2	UC	UC	UC
2009	Bart Jan Christiane Weetjens	Tuberculosis	Samples are inserted into cassette- carriers of 10 samples each, which are placed under the corresponding sniffing holes in the cage. The sniffing holes are covered with metal plates between testing to keep headspace vapour in the air above the sputum and to allow systematic sniffing of the samples by the rats.	Configuration (cage), in which samples are lined up	Line	10	Variable	Yes	UFC	DB2	UC	UC	UC
2010	Horvath	Cancer - Ovarian	Target and non-target samples were placed in glass containers, which were covered with perforated lids and placed inside wooden boxes (25 cm × 25 cm × 25 cm). The boxes and containers were cleaned with 95% alcohol after each run	1+/5-	Line	6	1	No	FC	DB2	UC	UC	UC
		Cancer - Ovarian	Blood samples with >500 IU CA-125 values were used for training, with one drop being placed in a small plastic dish inside each box || Target and non-target samples were placed in glass containers, which were covered with perforated lids and placed inside wooden boxes (25 cm × 25 cm × 25 cm). The boxes and containers were cleaned with 95% alcohol after each run	1+/5-	Line	6	1	No	FC	DB2	UC	UC	UC
2010	Cornu	Cancer - Prostate	Samples were hidden in boxes. Each box had a hole so that the dog could not access the urine itself, but only its odor	6 samples (5 controls and 1 cancer)	Line	6	1	No	FC	DB1	UC	UC	UC
2011	Willis	Cancer - Bladder	Samples were defrosted and pipetted onto Whatman No. 1 filter paper (42.5 mm diameter) placed in 60 ml (40 mm diameter) polypropylene specimen containers (LSL (UK) Ltd. Rochdale, UK), and used immediately in a wet state ||| The urine containers were clipped onto the ends of the arms of a purpose-built stainless steel carousel	Purpose-built stainless steel carousel, such that the distance between each sample was 70 cm. Metal baffles shielded each of the sample stations, so as to minimize cross currents of air. Direct contact with the urine sample was prevented through the use of a flat metal plate into which had been drilled a 30 mm diameter hole, which partially covered the sample pot. Cross contamination from one run…	Circle	7	1	No	FC	DB2	12.6°C to 20.9°C (median 18.3°C)	42% to 73% (median 61%)	UC
2011	Sonoda	Cancer - Colorectal	Each station consisted of a light blue painted wooden storage container measuring 27 cm wide, 30 cm long and 20 cm high. Each station also contained a wall 10 cm deep in which the breath sample bags or the watery stool sample bottles were placed. The top of each box was covered with metal netting to prevent the dog from directly contacting the samples	Five sample stations were positioned on the floor of the room in a single straight line spaced 52 cm apart	Line	5	1	No	FC	DB1	9°C to 20°C	UC	UC
		Cancer - Colorectal	The samples were removed from the breath-sampling bag and placed into a paper cup which was then covered with a paper filter for 2 days. The five sample cups were placed on the floor by the handler	Five sample stations were positioned on the floor of the room in a single straight line spaced 52 cm apart	Line	5	1	No	FC	DB1	9°C to 20°C	UC	UC
2012	Buszewski	Cancer - Lung	The removable inserts were taken out of the tubes and placed in sterile polypropylene boxes covered with hole-punched lids to prevent direct contact of a dog’s nose with the insertion, salivation, etc	1+/4-	Line	5	1	No	FC	DB1	UC	UC	UC
2012	Ehmann	Cancer - Lung	For testing, the probes were positioned in five separate retainers on the floor, with the rubber caps removed	1+/4-	UC	5	1	No	FC	DB1	?	?	?
2012	Walczak	Cancer (several)	For testing the odor samples, the removable insertions were taken out of the tubes and put in sterile polypropylene boxes covered with hole-punched lids. Hole- punched lids were changed after each set of trials. || Scent samples in the polypropylene boxes were put in metallic containers for the dogs to sniff.	Five heavy pots with metallic containers, placed 1-m apart, formed a semicircular lineup on the floor.	Semi circular	5	1	No	FC	DB1	UC	UC	UC
2012	Bomers	Clostridium difficile	Wooden sticks impregnated from culture plates, and also impregnated materials other than the sticks, such as paper, fabric, and metal, and in different environments such as a kitchen, forest, or petrol station to vary background odours	UC	UC	2	1	No	UFC	UC	UC	UC	UC
		Clostridium difficile	Patients	Patients at hospital	Free running	10	1	No	FC	SB	RT	UC	UC
2012	Georgies F Mgode	Tuberculosis	Pots containing sputum placed beneath the holes	Testing was conducted in a chamber 205 cm long, 55 cm wide, and 55 cm high with clear plastic walls and ceiling and a stainless steel floor. Ten holes with sliding lids 2.5 cm in diameter were spaced equidistance apart along the centerline of the chamber floor’s long axis. Pots containing sputum were placed beneath the holes for the rats to evaluate.	Line	10	Variable	Yes	UFC	DB2	UC	UC	UC
2012	Mahoney	Tuberculosis	Pots containing sputum placed beneath the holes	Testing was conducted in a chamber 205 cm long, 55 cm wide, and 55 cm high with clear plastic walls and ceiling and a stainless steel floor. Ten holes with sliding lids 2.5 cm in diameter were spaced equidistance apart along the centerline of the chamber floor’s long axis. Pots containing sputum were placed beneath the holes for the rats to evaluate.	Line	10	Variable	Yes	UFC	DB2	UC	UC	UC
2013	Horvath	Cancer - Ovarian	Blood samples with >500 U/ml CA-125 values were used for dog training, with one drop being placed in a small plastic dish inside each box.	Each run included seven boxes, placed in a circle about 2 m apart from each other. Each box contained a drop of plasma; five contained control materials, one contained a test sample, and one contained a reference sample	Circle	7	1	No	FC	Double	UC	UC	UC
		Cancer - Ovarian	Blood samples with >500 U/ml CA-125 values were used for dog training, with one drop being placed in a small plastic dish inside each box.	Each run included seven boxes, placed in a circle about 2 m apart from each other. Each box contained a drop of plasma; five contained control materials, one contained a test sample, and one contained a reference sample	Circle	7	1	No	FC	Double	UC	UC	UC
2014	Amundsen	Cancer - Lung	Both the exhaled air containers and thawed urine (1 – 2 droplets in sterile a cryotube) were immediately put into separate specially sealed glass containers to eliminate possible mixing of different odour com- pounds. The containers were labelled with a code number with reference to the patient, date of test, and type of test material.	Exhaled breath or urine samples from the subjects were randomly placed in a roundel. The exhaled breath and urine samples were tested separately. Thus, the roundel consisted of samples from patients with either cancer or other lung diseases. The number of cancer samples in the rondels varied from 0 – 6 samples.	Circle	6	0-6	Yes	UFC	DB1	UC	UC	UC
		Cancer - Lung	Urine samples were thawed up and the olfactory test was performed (first urine test, after basic training), and re-frozen before it was thawed up again for the second urine test (after intensifi ed training) 6 – 30 months after the time for collection (June – November 2009), dependent on the time of inclusion and the time interval to test performance.	Exhaled breath or urine samples from the subjects were randomly placed in a roundel. The exhaled breath and urine samples were tested separately. Thus, the roundel consisted of samples from patients with either cancer or other lung diseases. The number of cancer samples in the rondels varied from 0 – 6 samples.	Circle	6	0-6	Yes	UFC	DB1	UC	UC	UC
2014	Rudnicka	Cancer - Lung	For the test, remov- able inserts were taken out of the tubes and placed into sterile glass vessel covered with hole-punched lids to prevent touching the insert with breath sample from dog’s nose during sniffin	Five pots, heavy enough to prevent pushing by dogs during sniffing, were placed on the floor in a lineup approximately 1m apart. The glass boxes with breath samples were placed into pots by the experimenter. One target sample containing breath sample from patient with cancer was placed in a randomly selected position in the lineup and the remaining four pots contained complementary samples from h…	Line	5	1	No	FC	DB1	UC	UC	UC
2014	Elliker	Cancer - Prostate	During training or testing, 1 ml aliquots were heated to 37°C in a water bath and then presented to the dogs in new open-top, polypropylene test tubes.	6 m × 10 m rubber-floored arena. Urine samples were presented in four, 90 mm-deep aluminium flasks recessed into a 3 m long floor-mounted plastic array. The urine was not visible or accessible to the dogs other than by olfaction through four, 20 mm-diameter ‘scent holes’, spaced 0.75 m apart, positioned directly above each flask. These holes were labelled above with numbers.	Line	4	1	No	FC	DB1	UC	UC	UC
2014	Bomers	Clostridium difficile	Patients	Free running	Free running	UC	UC	Yes	UFC	DB2	RT	UC	UC
2015	Rudnicka	Cancer - Lung	For the test removable inserts were taken out of the tubes and put in sterile glass vessel covered with hole-punched lids to prevent the dog’s nose from touching the insert with breath sample during sniffing	Five pots, heavy enough to prevent pushing by dogs during sniffing, were placed on the floor in a lineup approximately 1m apart. The glass boxes with breath samples were placed into pots by the experimenter. One target sample containing breath sample from patient with cancer was placed in a randomly selected position in the lineup and the remaining four pots contained complementary samples from h…	Line	5	1	No	FC	DB1	UC	UC	UC
2015	Taverna	Cancer - Prostate	After defrosting 2 ml of each urine sample were housed in circular perforated metal containers to allow the passage of odors. The metal containers were placed in thermally sealed plastic packets to avoid operator dependent or other contamination	Runs of 6 samples	Circle	6	0 - 6	Yes	UFC	DB2	UC	UC	UC
2015	Taverna	Cancer - Prostate	After defrosting 2 ml of each urine sample were housed in circular perforated metal containers to allow the passage of odors. The metal containers were placed in thermally sealed plastic packets to avoid operator dependent or other contamination	Runs of 6 samples	Circle	6	0 - 6	Yes	UFC	DB2	UC	UC	UC
2015	Urbanova	Cancer - Prostate	Before the samples were presented to the dog, the urine was slowly thawed and brought to room temperature	The training took place in a room designated for that purpose with a floor covered with marmoleum which was washed with a disinfectant solution every day. In the first stage, the samples along with the test tube were placed in a container of sand covered with gauze; later they were placed in plastic beakers of a volume of 30 ml with a perforated lid. The beakers with the samples were fixed to the…	Line	3	1	No	FC	UC	UC	UC	UC
2015	Yoel	Cancer (several)	The target and control specimens were placed in identical concrete blocks, which were laid out so that neither dog could get to the specimen	Blocks that were arranged in a straight line at one meter intervals	Line	4	1	No	FC	SB1	UC	UC	UC
2015	Reither	Tuberculosis	Pots containing sputum placed beneath the holes	Testing was conducted in a chamber 205 cm long, 55 cm wide, and 55 cm high with clear plastic walls and ceiling and a stainless steel floor. Ten holes with sliding lids 2.5 cm in diameter were spaced equidistance apart along the centerline of the chamber floor’s long axis. Pots containing sputum were placed beneath the holes for the rats to evaluate.	Line	10	Variable	Yes	UFC	DB2	UC	UC	UC
2016	Hackner	Cancer - Lung	Racks with only the openings pointing outward in order to attract the dogs’ attention towards the rack and eprouvettes	UC	Line	5	0-5	Yes	UFC	DB2	UC	UC	UC
2016	Willis	Cancer - Melanoma	The gauze- containing vials, which remained stored at -40 oC at the training facility when not in use, were placed in 2.5 cm diameter holes drilled 40 cm apart along wooden planks to a depth sufficient to prevent the dog dislodging them. The vial necks were too narrow to allow the dog to make direct contact with the samples. Prior to training (and testing), the samples were allowed to warm up to …	UC	Line	10	1	No	FC	DB1	UC	UC	UC
2016	Maurer	UTI	Urine (1 mL) was placed in a 2-mL CryoTube vial (Thomas Scientific) and then placed in a tray.	These trays were then placed in 5 separate plastic scent detection boxes, which were lined up on the floor at 65.0 cm apart. The boxes allowed air circulation around the urine samples, which could not be reached by the dog’s nose or mouth. The boxes were 30.5-cm square and 25.4-cm tall with a 5.0-cm circular opening at the top. The boxes were also of sufficient weight to prevent tipping, and each…	Line	5	0-1	Yes	UFC (UC if dog handler knew when there were blank runs)	DB1	21 - 26°C	UC	UC
2017	Guerrero-Flores	Cancer - Cervical	smear samples, surgical bandages, biopsy Two groups of artifacts were used during training trials: 1) ten 20 cm cubic wood boxed with a 5 cm hole in the upper side, and 2) ten steel cylindrical containers measuring 15 cm of diameter and and 30 cm high. The two groups were used interchangeably, but only one group would be used during a given trial.	UC	Circle, 50 cm apart	10	1	No	FC	DB1	UC	UC	UC
2017	Kitiyakara	Cancer - Liver	The Ziploc® bags were transported together to a separate training/testing site where the Ziploc® bags would be opened and placed into a scenting container. This container would be made out of a curved plastic pipe with an opening at the level of a dog’s nose on the scenting table. The opening would be covered by a grill to prevent the dog’s nose touching the sample Scenting table	Final testing phase : 1 HCC: 3 healthy controls per test run	Circle	4	1	No	FC	SB	UC	UC	UC
2017	Guirao-Montes	Cancer - Lung	Glass tubes	UC	Line	5	1	No	FC	UC	UC	UC	UC
2017	Bryce	Clostridium difficile	Materials were hidden initially in wooden sniff boxes, then in large PVC containers and finally in smaller “hides” commonly used in scent detection	Container runs consisted of C.difficile odour positive and negative gauzes in sterile containers that were placed inside 25 PVC containers with perforated lids by the investigators. The latter containers (which had been washed in an industrial washer, dried and then wiped with accelerated hydrogen peroxide wipes prior to each evaluation) were placed in a single line approximately 2.4-3.0 m apart,…	Line	UC	Possibility of several	UC	UC (the handler knows how many positives there are)	DB1	UC	UC	UC
		Clostridium difficile	Hidden in hospital ward	Hidden in hospital	Free running	UC	Possibility of several	UC	UC (the handler knows how many positives there are)	DB1	UC	UC	UC
2017	Koivusalo	Methicillin-resistant Staphylococcus aureus	Each station consisted of the prepared plate secured in a perforated stainless steel cylinder and a secondary metal basket to prevent direct contact.	Line-up of three stations positioned 50 cm apart	Line	3	1	No	FC	DB1	UC	UC	UC
2018	In-Seok Seo	Cancer - Breast	The boxes (350×150×170 mm) used in the study were made with acrylic plastic, and five boxes were used for training and testing. A hole (65 mm in diameter) which is filled with either the experimental or control group was placed in the center ofthe boxes. To protect the odor samples(experimental and control group) from contamination, all the samples were placed in separate 5 ml microtubes and kept…	One sample from the experimental group and four samples from the control group were placed randomly in the boxes using computer program. All	Line	5	1	No	FC	DB (UC 1 or 2)	22±2˚C	55±5%	UC
		Cancer - Colorectal	The boxes (350×150×170 mm) used in the study were made with acrylic plastic, and five boxes were used for training and testing. A hole (65 mm in diameter) which is filled with either the experimental or control group was placed in the center ofthe boxes. To protect the odor samples(experimental and control group) from contamination, all the samples were placed in separate 5 ml microtubes and kept…	One sample from the experimental group and four samples from the control group were placed randomly in the boxes using computer program. All	Line	5	1	No	FC	DB (UC 1 or 2)	22±2˚C	55±5%	UC
2018	Fischer-Tenhagen	Cancer - Lung	The main innovations were the improved fleece tubes for breath sampling and the cone-shaped sample-holder (Figure 1, patent DE 10 2013 109 901.7) that allowed placing and changing the fleece tube easily for detection dog training and breath sample testing. The design of the fleece tubes and the sample-holders enabled reproducible test runs, efficient cleaning of devices between runs and avoided c…	1+/3- | In the final training phase, number of positive cones per trial could vary from 0 to 4. When there was no positive in the trial, the dog was rewarded for returning to the handler after sniffing at all cones	Line up (the cones were palced 50 cm apart from each other and at a distance of 2m from the dog's starting point)	4	0 to 4	Yes	UFC	DB1	UC	UC	UC
2018	Pacik	Cancer - Prostate	The beakers were fixed to the floor using non-perfumed adhesives (pritt mult tackk) to prevent from being knocked over.	Each series contained only three samples to fully maintain the concentration of the dog for olfactory analysis. This also allowed keeping a sufficient distance between analysed samples (at least75 cm) to prevent fusion of odours, which could bias the analysis.	Line	3	1	No	FC	No	UC	UC	UC
2018	Thuleau	Cancer - Breast	Box (made of food-grade stainless steel	Scent line-up of 4 samples	Line	4	1	No	FC	DB2	4,3°C	UC	UC
2018	Maureen T. Taylor	Clostridium difficile	The vials were then placed within visually identical metal scent boxes	Decommissioned ward with hospital beds and equipment but no patients or staff	Free running	10	1 to 5	No	UCF (but at least 1+)	DB1	UC	UC	UC
2018	Edwards	Tuberculosis	Samples were insered into cartridges that held 10 samples each in the order specified by a database, which randomly assigned samples to positions in the sample array. The cartridges were locked in place beneath 10 holes in the floor of a 205-cm long, 55-cm wide, and 55-cm high, aluminium and acrylic glass cage	The proportion of positive samples included in evaluation sessions was initially set at 10% and adjusted downward in 2% increments (Table 1). The proportion was reduced after at least two 5-session blocks without any visible trend in sensitivity (proportion of positive samples correctly indicated) in the final block. If average sensitivity was below 60% for two consecutive 5-session blocks, the p…	UC	10	initially at 10% and adjusted downword in 2% increments	UC	UFC	DB1	UC	UC	UC
2019	Schoon	Cancer - Colorectal	1ml Eppendorf tubes	Carousel	Circle	8	0-1-2	Yes	UFC	DB2	UC	UC	UC
2019	Biehl	Cancer - Lung	UC	Educated to search for hidden targets with only very few scents (like coins) and indicate them in a field or in sample stations	UC	UC	UC	UC	UC	UC	UC	UC	UC
2019	Feil	Cancer - Lung	UC	UC	UC	6 (deduced)	1 (deduced)	No (deduced)	FC	Double (not precise enough)	UC	UC	UC
		Cancer - Lung	UC	UC	UC	6 (deduced)	1 (deduced)	No (deduced)	FC	Double (not precise enough)	UC	UC	UC
2019	Guirao	Cancer - Lung	Tubes containing the exhaled gas samples were inserted in wooden boxes that had an open end to allow the sniffing of the sample	5 boxes in line	Line	5	1	No	FC	UC	UC	UC	UC
2019	Junqueira	Cancer - Lung	Prior to training, each sample was stored in 2 mL of Cryovial (Thomas Scientific), freestanding polypropylene vials with external threaded caps. Researchers used 250 μL of each blood serum sample for training. During the training phase, the samples were thawed for 15 minutes, and the vials were placed in new 12-mL syringe cases. The syringes with the samples were placed in metal canisters with mu…	canisters with the cancer and control samples were evenly placed at the dogs’ eye level.	UC	5	1	No	FC	UC(Double reported)	UC	UC	UC
2019	Murarka	Cancer - Ovarian	For each trial, 3 pieces of filter paper were presented to the dog in a single glass jar	Odor detection wheel, stainless-steel barrier between each port, to keep the odor cones more separated	Circle	8	0-1	Yes	UFC	DB1	UC	UC	UC
2019	Protoshhak	Cancer - Prostate	UC	UC	UC	UC	UC	UC	UC	UC	UC	UC	UC
2019	Chen Li	Clostridium difficile	Hospital	Free running	Free running	NA	NA	Yes	UFC	DB2	RT	UC	UC
2019	Guest	Malaria	UC	UC	UC	UC	UC	UC	UC	UC	UC	UC	UC
2020	Shoko Kure	Cancer - Breast	The test boxes were wooden, storage containers 27 × 30 × 20 cm in size. Each box is equipped with a 10 cm wall inside to hold a urine sample tube. So the dog does not come in direct contact with the test sample, each box was covered with a metal mesh.	To conduct the test, 5 test boxes were placed in a straight line on the foor, one meter apart	Line	5	1	No	FC	DB2	UC	UC	UC
2020	Yamamoto	Cancer - Cervical	The test boxes were wooden storage containers painted light blue and measuring 27 cm wide, 30 cm deep, and 20 cm long. Inside each box was fitted with a 10 cm deep wall on which a urine sample tube could be placed. So the dog would not come in direct contact with the test sample, each box was covered by a metal mesh	The five test boxes were placed in a straight line on the floor at a distance of 1 m apart	Line	5	1	No	FC	DB1	UC	UC	UC
2020	Mazzola	Cancer - Lung	For presentation to the dogs, samples were defrosted and immediately used, in a wet state. Six sample stations, specially designed for this study and constructed of heavy stainless steel and aluminum, were positioned in a single straight line, spaced 0.75 m apart, on the floor. Secutainer tubes with urine samples were put into a metallic casing, protected by a perforated metal cover, for the dogs…	a urine sample of a lung cancer patient (LC Group) was randomly placed in the six sample stations among five control samples (PP and H Groups)	UC	6	1	UC	FC	DB2	UC	UC	UC
2020	Grandjean	COVID-19	Sample in a glass jar, screwed on a stainless steel olfaction cone	A 4-cone lineup	Line	3 or 4	1	No	FC	SB1	UC	UC	UC
2020	Jendrny	COVID-19	A volume of 100 μl per sample was pipetted onto a cotton pad, which was placed into a 4 ml glass tube	The presentation of the samples to the dogs was con- ducted via a device called Detection Dog Training System (DDTS; Kynoscience UG, Germany), which can present samples in a randomised automated manner without trainer interference	Line	7	1	No	FC	DB2	UC	UC	UC
2020	Vesga	COVID-19	130-mL transparent glass flasks with a metallic mouth (4.5 cm diameter). They were covered with a 10 x10 cm2 piece of DuPont Tychem™ and sealed hermetically with a screwable metallic cap that had a 1 cm hole in the center.	For each experiment, the dogs went through an open field arrangement of 10 x 10 samples (100) distanced 2 m in all directions	Array	100	Various	Yes	UFC	SB	UC	UC	UC
2021	Guest	Cancer - Prostate	Test pot was placed into the metal arm attached to a carousel	Ports in a line, or carousel (UC)	UC	4	UC	Yes	UFC	DB1	UC	UC	UC
2021	Eskandary	COVID-19	UC	Samples were placed in groups of 10 consist- ing of one to three positive samples for COVID-19 inside a dogs training wheel.	Circle	10	1 to 3	No	UFC	SB1	UC	UC	UC
		COVID-19	UC	Samples were placed in groups of 10 consist- ing of one to three positive samples for COVID-19 inside a dogs training wheel.	Circle	10	1 to 3	No	UFC	SB1	UC	UC	UC
2021	Essler	COVID-19	Stainless-steel ports	12-port scent wheels. Each port was monitored by a motion sensor which recorded the duration oftime the dog spent at the port. Each wheel contained controls (e.g. SARS-CoV-2 negative samples treated with the same inactivation protocol as targets) as well as distractors (e.g. gloves, empty TADD, garlic on filter paper, SharpieTM marker on filter paper, TADD with coconut flavoring, paperclips, mari…	Circle	12	0 or 1	Yes	UFC	DB1	UC	UC	UC
2021	Grandjean	COVID-19	Sample in a glass jar, screwed on a stainless steel olfaction cone	Sequential five and seven‐cone line‐ups	Line	5-7	1	No	FC	DB1	UC	UC	UC
2021	Guest	COVID-19	For presentation to the dogs, the samples were defrosted at room temperature for 60 min. The lid was then removed, and each glass vial clipped into a stainless-steel arm with a grill covering the vial opening. Each arm was then placed in a stainless-steel retort stand	The dogs were tested using a stand system which held the glass vial containing the sock sample.	Line	3	0-3	Yes	UFC	DB1	14.2-20.6°C	38-53%	UC
2021	Jendrny	COVID-19	Glasses specially designed for scent dog training (Training Aid Delivery Device (TADD), Sci-K9, USA) containing an odour-permeable but hydro- and oleophobic fluoropolymer membrane were used. A 1 x 1 x 0.5 cm cotton pad soaked with 100 µl of fluid sample material or a snippet of the cotton pad used for sweat sampling was placed at the bottom of the TADD-glass and the glass was safely sealed in the…	Detection Dog Training System’ (DDTS, 144 Kynoscience UG, Hörstel, Germany) was utilised, which provided automated and randomised sample presentations for the dogs as well as automatic rewards	Line	7	1	No	FC	DB (UC 1 or 2)	24°C	UC	UC

## Sheet: Table 6 - Performances
Table 6 - Performances
Year	1st author	Animal - class	Animals - number	Scent line up - Possibility of blanks	Scent line up - Forced Choice vs UFC	Blinded (no / SB / DB1 / DB2)	Sensitivity	Specificity	Controls similar to positives ?	Number of samples for testing - total	Number of positive samples for testing	Number of controls for testing	Controls reused (for testing)
2004	Willis	Dog	6	No	FC	DB2	0.41	UC	Yes	63	9	54	No
2004	Pickel	Dog	2	Yes	UFC	DB1	1	1	No	UC	UC	UC	UC
2004	Pickel	Dog	2	Yes	FC	DB1	0.8	UC	Yes	UC	7	UC	No
2006	McCulloch	Dog	5	No	FC	DB2	0.97	1	Yes	23	6	17	UC
2006	McCulloch	Dog	5	No	FC	DB2	0.99	0.98	Yes	45	28	17	UC
2008	Gordon	Dog	6	No	FC	DB2	0.22	FC	Yes	63	9	54	No
2008	Horvath	Dog	1	No	FC	DB2	1	0.98	Yes	100	20	80	No
2008	Gordon	Dog	4	No	FC	DB2	0.18	FC	Yes	77	11	66	No
2009	Bart Jan Christiane Weetjens	Rat	20	Yes	UFC	DB2	0.73	0.93	Yes	819	67	752	No
2010	Horvath	Dog	1	No	FC	DB2	1	0.96	Yes	60	10	50	No
2010	Horvath	Dog	1	No	FC	DB2	1	0.94	Yes	60	10	50	No
2010	Cornu	Dog	1	No	FC	DB1	0.91	0.91	Yes	66	33	33	Yes
2011	Willis	Dog	4	No	FC	DB2	0.64	FC	Yes	210	30	180	No
2011	Sonoda	Dog	1	No	FC	DB1	0.97	0.99	Yes	185	37	148	No
2011	Sonoda	Dog	1	No	FC	DB1	0.91	0.99	Yes	165	33	132	No
2012	Buszewski	Dog	UC	No	FC	DB1	0.82	0.82	Yes	73	29	44	Yes (deduced from the numbers)
2012	Ehmann	Dog	4	No	FC	DB1	0.9	0.72	Yes	125	25	100	No
2012	Walczak	Dog	6	No	FC	DB1	0.37	FC	Yes	UC	UC	UC	UC
2012	Bomers	Dog	1	No	UFC	UC	1	1	Yes	100	50	50	No
2012	Bomers	Dog	1	No	FC	SB	0.83	0.98	No	300	30	270	No
2012	Georgies F Mgode	Rat	10	Yes	UFC	DB2	0.804	0.724	Yes	284	56	228	No
2012	Mahoney	Rat	10	Yes	UFC	DB2	0.68	0.87	Yes	490	81	409	UC
2013	Horvath	Dog	2	No	FC	Double	0.97	0.99	Not aged matched	252	42	210	No
2013	Horvath	Dog	2	No	FC	Double	0.7	0.95	Not aged matched	60	10	50	No
2014	Amundsen	Dog	4	Yes	UFC	DB1	0.7	0.083	UC	93	63	30	UC
2014	Amundsen	Dog	4	Yes	UFC	DB1	0.657	0.25	UC	77	UC	UC	UC
2014	Rudnicka	Dog	2	No	FC	DB1	0.86	0.72	Yes	253	108	145	UC
2014	Elliker	Dog	10	No	FC	DB1	0.17	0.72	Yes	60	15	45	No
2014	Bomers	Dog	1	Yes	UFC	DB2	0.86	0.97	Yes	371	14	357	No
2015	Rudnicka	Dog	2	No	FC	DB1	0.8554	0.7184	Yes	253	108	145	UC
2015	Taverna	Dog	2	Yes	UFC	DB2	0.986	0.964	Yes	902	362	540	No
2015	Taverna	Dog	2	Yes	UFC	DB2	1 (pre operatively)	UC	UC	UC	UC	UC	UC
2015	Urbanova	Dog	1	No	FC	UC	0.935	0.916	Yes	70	45	25	Yes
2015	Yoel	Dog	2	No	FC	SB1	1	1	Yes	UC	20	UC	UC
2015	Reither	Rat	7	Yes	UFC	DB2	0.569	0.805	Yes	469	109	360	No
2016	Hackner	Dog	6	Yes	UFC	DB2	0.786	0.344	Yes	122	29	93	No
2016	Willis	Dog	2	No	FC	DB1	0.45	UC	Yes	200	20	180	No
2016	Maurer	Dog	5	Yes	UFC (UC if dog handler knew when there were blank runs)	DB1	0.996	0.915	UC	UC	231	456	No
2017	Guerrero-Flores	Dog	1	No	FC	DB1	Scrapes: 92,78% Surgical bandages: 96.36	Scrapes: 99.1% Surgical bandages: 99.55%	UC	Scrapes: 873 Surgical bandages: 495	Scrapes: 97 Surgical bandages: 55	Scrapes: 776 Surgical bandages: 440	Yes
2017	Kitiyakara	Dog	1	No	FC	SB	0.78	UC	Healthy controls were matched for age, sex and smoking history Control samples were collected within one day from the matched HCC sample to mnimize the differene between the scents from aging Control samples were collected in the outpatients waiting room in the same manner as the collection of HCC samples	UC	37	UC	HCC patients were never re-samples for testing to prevent the dog from remembering individal scents
2017	Guirao-Montes	Dog	1	No	FC	UC	0.95	0.98	No: Patients in the LC group were older Gender distribution was similar between groups	UC	65	11(patietns without LC)+17 (healthy subjects)	Yes
2017	Bryce	Dog	1	UC	UC (the handler knows how many positives there are)	DB1	1	0.97	Yes	75	UC	UC	UC
2017	Bryce	Dog	1	UC	UC (the handler knows how many positives there are)	DB1	0.8	0.929	Yes	53	UC	UC	UC
2017	Koivusalo	Dog	1	No	FC	DB1	0,75 - 0,97	0,83 - 0,96	Yes	UC	UC	UC	UC
2018	In-Seok Seo	Dog	2	No	FC	DB (UC 1 or 2)	0.944	0.986	yes : To rule out possibility that the detection dogs would become aware of the excipients, all the culture liquid used in the cancer cell and primary cell culture were contained exactly identical components, and cultured under the same culture conditions (temperature and humidity) as the cancerous cells for 4 days	UC	320	1280	All the samples used in the experiment were used only once
2018	Thuleau	Dog	2	No	FC	DB2	0.903	FC	No (age)	87	36	51	Yes
2018	In-Seok Seo	Dog	2	No	FC	DB (UC 1 or 2)	0.926	0.981	yes : To rule out possibility that the detection dogs would become aware of the excipients, all the culture liquid used in the cancer cell and primary cell culture were contained exactly identical components, and cultured under the same culture conditions (temperature and humidity) as the cancerous cells for 4 days	UC	320	1280	All the samples used in the experiment were used only once
2018	Fischer-Tenhagen	Dog	4	Yes	UFC	DB1	0.944444	0.6	Yes (Controp persons were matched concerning age, sex and smoking habits)	19	9	10	Fleece tube training samples were used multiple times Fleece tube testing samples were used up to
2018	Pacik	Dog	1	No	FC	No	0.7	0.85	Yes	180	60	120	No
2018	Maureen T. Taylor	Dog	2	No	UCF (but at least 1+)	DB1	0.851	0.848	UC	300	90	210	No
2018	Edwards	Rat	8	UC	UFC	DB1	UC	UC	UC	UC	UC	UC	UC
2019	Schoon	Dog	8	Yes	UFC	DB2	0.795	UC	Not fully age and gender matched	UC	UC	UC	No
2019	Biehl	Dog	14	UC	UC	UC	0.556	0.829	UC	44	9	35	UC
2019	Feil	Dog	1	No (deduced)	FC	Double (not precise enough)	0.878	0.976	UC	246	41	205	No
2019	Feil	Dog	1	No (deduced)	FC	Double (not precise enough)	0.78	0.956	UC	246	41	205	No
2019	Guirao	Dog	1	No	FC	UC	0.97	0.99	UC	109	30	79	UC
2019	Junqueira	Dog	4	No	FC	UC(Double reported)	0.97	0.98	UC	50	10	40	YES : controls for testing came from controls for training
2019	Murarka	Dog	3	Yes	UFC	DB1	UC	UC	UC	UC	UC	UC	UC
2019	Protoshhak	Dog	2	UC	UC	UC	0.9785	0.95	UC	110	70	40	UC
2019	Chen Li	Dog	2	Yes	UFC	DB2	UC	UC	Yes	659	UC	UC	NA
2019	Guest	Dog	2	UC	UC	UC	0,769 - 0,903	~0,9	Yes	175	30	145	UC
2020	Shoko Kure	Dog	1	No	FC	DB2	1	1	Yes	200	40	160	No
2020	Yamamoto	Dog	1	No	FC	DB1	1	1	Yes	195	83	112	UC
2020	Mazzola	Dog	6	UC	FC	DB2	0,45-0,73	0,89-0,91	Yes: (table 2 - comparison age/sex are concordant between patients and healthy subjects)	66	11	55	No
2020	Grandjean	Dog	6	No	FC	SB1	0,76 - 1	UC	No (symptoms, no age matched)	UC	UC	UC	Yes
2020	Jendrny	Dog	8	No	FC	DB2	0.8263	0.9635	No	14	7	7	UC
2020	Vesga	Dog	6	Yes	UFC	SB	0.955	0.99	No (symptoms)	113	12	101	UC
2021	Guest	Dog	2	Yes	UFC	DB1	0.71	0,7 - 0,76	Yes	28	7	21	No
2021	Eskandary	Dog	3	No	UFC	SB1	0.65	0.89	No (symptoms)	80	26	54	UC
2021	Eskandary	Dog	3	No	UFC	SB1	0.86	0.929	No (symptoms)	120	50	70	UC
2021	Essler	Dog	9	Yes	UFC	DB1	0.18	0.41	No (symptoms)	UC	UC	UC	UC
2021	Grandjean	Dog	21	No	FC	DB1	0,71 - 1	UC	No (symptoms)	261	151	110	UC
2021	Guest	Dog	6	Yes	UFC	DB1	0,82 - 0,94	0,76 - 0,92	Yes	400	200	200	No
2021	Jendrny	Dog	10	No	FC	DB (UC 1 or 2)	Saliva = 0,82 Sweat = 0;91 Urine = 0,95	Saliva = 0,96 Sweat = 0,94 Urine = 0,98	Yes	UC	UC	UC	UC

## Sheet: Table 7 - Sample NB stats
	Table 7 - Number of samples used
	Training					Testing
	% data available	Mean number of sample per study	SD number of sample per study	Min number	Max number	% data available	Mean number of sample per study	SD number of sample per study	Min number	Max number
All diseases	0.22973	258	560	20	2600	0.756757	184	186	14	902
Cancer	0.367347	142	96	20	430	0.795918	138	147	19	902
Others	0.04	2600	NA	NA	NA	0.68	282	222	14	819
Covid	0.111111	2600	NA	NA	NA	0.555556	165	141	14	400
